1 **Full title:**

2 **Prediction error signaling explains neuronal mismatch responses in the**  
3 **medial prefrontal cortex**

4  
5 **Short title:**  
6 **Prediction error signaling in medial prefrontal cortex**

7  
8  
9

10 **Authors**

11 Lorena Casado-Román<sup>1,2†</sup>, Guillermo V. Carbajal<sup>1,2†</sup>, David Pérez-González<sup>1,2\*</sup> & Manuel S.  
12 Malmierca<sup>1,2,3\*</sup>

13

14 <sup>1</sup> Cognitive and Auditory Neuroscience Laboratory (CANELAB), Institute of Neuroscience of Castilla y León (INCYL),  
15 Salamanca, Spain.

16 <sup>2</sup> Institute for Biomedical Research of Salamanca (IBSAL), Salamanca, Spain.

17 <sup>3</sup> Department of Biology and Pathology, Faculty of Medicine, University of Salamanca, Salamanca, Spain.

18 †These authors contributed equally to this work.

19 \*Corresponding authors: davidpg@usal.es (DPG), msm@usal.es (MSM)

20

21

22

23

24

25

26

27

28

## 29 **Abstract**

30 The mismatch negativity (MMN) is a key biomarker of automatic deviance detection thought to  
31 emerge from two cortical sources. First, the auditory cortex (AC) encodes spectral regularities and  
32 reports frequency-specific deviances. Then, more abstract representations in the prefrontal cortex  
33 (PFC) allow to detect contextual changes of potential behavioral relevance. However, the precise  
34 location and time asynchronies between neuronal correlates underlying this fronto-temporal network  
35 remain unclear and elusive. Our study presented auditory oddball paradigms along with ‘no-  
36 repetition’ controls to record mismatch responses in neuronal spiking activity and local field  
37 potentials at the rat medial PFC. Whereas mismatch responses in the auditory system are mainly  
38 induced by stimulus-dependent effects, we found that auditory responsiveness in the PFC was driven  
39 by unpredictability, yielding context-dependent, comparatively delayed, more robust and longer-  
40 lasting mismatch responses mostly comprised of prediction error signaling activity. This  
41 characteristically different composition discarded that mismatch responses in the PFC could be  
42 simply inherited or amplified downstream from the auditory system. Conversely, it is more plausible  
43 for the PFC to exert top-down influences on the AC, since the PFC exhibited flexible and potent  
44 predictive processing, capable of suppressing redundant input more efficiently than the AC.  
45 Remarkably, the time course of the mismatch responses we observed in the spiking activity and local  
46 field potentials of the AC and the PFC combined coincided with the time course of the large-scale  
47 MMN-like signals reported in the rat brain, thereby linking the microscopic, mesoscopic and  
48 macroscopic levels of automatic deviance detection.

49

50 **Keywords:** auditory processing, sensory memory, stimulus-specific adaptation (SSA), mismatch  
51 negativity (MMN), neuronal activity, prediction error, predictive coding, predictive  
52 processing, prefrontal cortex (PFC), repetition suppression

53

## 54 **Abbreviations**

55 Anterior cingulate cortex (ACC), auditory brainstem responses (ABR), auditory cortex (AC), control  
56 condition (CTR), deviant condition (DEV), electrocorticography (ECoG), event-related potential  
57 (ERP), false discovery rate (FDR), frequency response area (FRA), index of neuronal mismatch  
58 (iMM), index of prediction error (iPE), index of repetition suppression (iRS), inferior colliculus (IC),  
59 infralimbic cortex (IL), local field potentials (LFP), medial geniculate body (MGB), medial  
60 prefrontal cortex (mPFC), mismatch negativity (MMN), prediction error (PE), prediction error  
61 potential (PE-LFP), prefrontal cortex (PFC), prelimbic cortex (PL), secondary motor cortex (M2),  
62 standard condition (STD), standard error of the mean (SEM).

63

## 64 **Introduction**

65 Since the discovery of the mismatch negativity (MMN) 4 decades ago [1,2], this biomarker has  
66 become a pivotal tool for cognitive and clinical research in the human brain [3,4], even showing  
67 potential diagnostic capabilities [5]. The MMN to reflect how the nervous system automatically  
68 encodes regular patterns in the sensorium, generates internal models to explain away those  
69 regularities, and detects deviations from those internal representations in upcoming sensory input, a  
70 processing mechanism that is key for survival [6]. This automatic process of deviance detection is  
71 commonly studied using an oddball paradigm, where a sequence of repetitive ‘standard’ tones is  
72 randomly interrupted by another rare ‘deviant’ tone. When the scalp-recorded auditory event-related  
73 potential (ERP) elicited by a tone presented in the standard condition (STD) is subtracted from the  
74 ERP prompted by that same tone presented in the deviant condition (DEV), a ‘mismatch’ response  
75 ( $DEV - STD$ ) becomes visible at temporal and frontal electrodes in the form of a slow negative  
76 deflection; hence the name, *mismatch negativity* [1,2,6].

77

78 The topographic distribution of the MMN reveals a fronto-temporal network in charge of automatic  
79 deviance detection [7–9]. According to the classic cognitive interpretation of the MMN [4,10],  
80 temporal sources from the auditory cortex (AC) would first encode acoustic regularities in a sensory  
81 memory, detecting specific sensory deviances between that memory trace and incoming input [11].  
82 Then, additional sources from the prefrontal cortex (PFC) assess the behavioral relevance of that  
83 sensory deviance, potentially triggering an attention switch towards the change [12–14]. A more  
84 neurophysiologically-grounded interpretation of the MMN, known as the adaptation hypothesis,  
85 denies the existence of a genuine process of deviance detection, arguing that the STD induces  
86 stimulus-specific adaptation (SSA) on AC neurons [15,16], whose frequency channels simply remain  
87 fresh to keep responding to the DEV [17,18]. Despite their conceptual disparities, both the sensory-  
88 memory and the adaptation hypotheses agree that early AC processing is highly sensitive to specific  
89 stimulus features. Conversely, PFC activity seems more reliant on an overall evaluation of global  
90 properties, which occurs upstream of initial sensory discrimination processes [6,19].

91  
92 Recent proposals under the predictive processing framework have attempted to integrate previous  
93 accounts of the generation of the MMN (for a recent in-depth discussion, see [20]), establishing a  
94 hierarchical and reciprocal relationship between the AC and the PFC. The AC would first represent  
95 the spectral properties of sensory stimuli, suppressing redundant auditory inputs based on their  
96 frequency-specific features, by means of short-term plasticity mechanisms such as synaptic  
97 depression and lateral inhibition [21–23]. During an oddball paradigm, this would be functionally  
98 observable as SSA, or more appropriately, as repetition suppression [22,24–26]. The information that  
99 could not be explained away in the AC is forwarded as a prediction error signal (PE) to higher levels  
100 in the processing hierarchy [27,28]. Eventually, the bottom-up flow of PEs reaches the PFC, which  
101 tries to explain PEs away by means of higher-order expectations regarding emergent properties of the  
102 auditory stimulation, such as complex interstimulus relationships and structures [22,29,30]. Thus,

103 whereas fast PEs forwarded from the AC are purely auditory in nature, the PFC would generate PEs  
104 when more abstract expectations are not met, requiring an update.

105

106 Despite the several hypotheses accounting for MMN generation, its neuronal substrate remains  
107 elusive and poorly understood, mostly due to the ethical constraints on human brain research. Non-  
108 invasive techniques, such as ERP analysis or functional magnetic resonance imaging, cannot  
109 pinpoint response measurements with enough temporal and spatial resolution as to deem with  
110 absolute certainty whether AC potentials precede those from the PFC [31–33]. When invasive  
111 approaches are available, electrocorticography (ECoG) electrode placement in human patients is  
112 strictly restrained by clinical criteria, causing intra- and inter-individual variability that hampers  
113 systematic and detailed comparisons [34–37]. In contrast, invasive techniques of electrophysiological  
114 recording in animal models offer both the spatial and temporal resolution necessary to compare  
115 mismatch signals across areas more precisely. Auditory-evoked spiking activity and local field  
116 potentials (LFPs) can provide the accurate locations and time courses of mismatch responses at  
117 microscopic and mesoscopic levels, respectively [38,39]. In turn, those local-scale mismatch  
118 responses can be correlated with the large-scale MMN-like potentials which are thought to be the  
119 specific analog of the human MMN in the corresponding animal model [40,41]. Hence, animal  
120 models can help to define the neuronal substrate of the human MMN, as well as to ratify or discard  
121 certain hypotheses about its generation.

122

123 In the present study, we recorded spiking activity and LFPs from one possible frontal source  
124 contributing to the emergence of MMN-like potentials in the rat brain: the medial prefrontal cortex  
125 (mPFC). Following the standards of the most thorough human MMN studies, we included two ‘no-  
126 repetition’ controls, namely, the many-standards [42] and the cascade sequences [43], in order to  
127 account for the possible stimulus-specific effects that could be induced by the oddball paradigm. We

128 found delayed, context-dependent, more robust, and longer-lasting mismatch responses in the rat  
129 mPFC than in our previous studies in the rat AC [38,39]. The mismatch responses recorded from  
130 both the AC and the mPFC as spiking activity and LFPs correlated in time with the large-scale  
131 MMN-like potentials from the rat brain reported in other studies [40,44,45]. Furthermore, the  
132 mismatch responses from the mPFC could be mainly identified with PE signaling activity (or  
133 genuine deviance detection, in classic MMN terminology), thus confirming their fundamentally  
134 different nature from the mismatch responses recorded in the AC.

135

## 136 **Results**

137 In order to find auditory mismatch responses and PEs in the mPFC, we recorded sound-evoked  
138 neuronal activity in the secondary motor cortex (M2), the anterior cingulate cortex (ACC), the  
139 prelimbic cortex (PL) and the infralimbic cortex (IL) of 33 urethane-anesthetized rats (Fig 1A). For  
140 this purpose, we used sets of 10 pure tones arranged in different sequences to create distinctive  
141 contextual conditions: the deviant conditions (*DEV ascending*, *DEV descending* and *DEV alone*) and  
142 the standard condition (*STD*) of the oddball paradigm (Fig 1C), along with their corresponding ‘no-  
143 repetition’ control conditions (*CTR*), provided by the many-standards (*CTR random*) and cascade  
144 sequences (*CTR ascending* and *CTR descending*; Fig 1D).

145

146 In the vein of human MMN research [43], we used CTRs to dissociate the higher-order processes of  
147 genuine deviance detection or abstract PE signaling from the possible contribution of other lower-  
148 order mechanisms related to spectral processing and SSA [21]. On the one hand, CTRs cannot not  
149 induce SSA or repetition suppression on the auditory-evoked response, in contrast to the STD. On  
150 the other hand, CTR patterns remain predictable and should not trigger deviance detection or PE  
151 signaling, or at least not as intensely as the DEV [20] (see *Oddball paradigm controls* for more  
152 detailed rationale). By comparing auditory-evoked responses in each condition, we could quantify

153 the estimated contribution of each process to the total mismatch response in the form of 3 indices  
154 (Fig 1B): index of neuronal mismatch ( $iMM = DEV - STD$ ), index of repetition suppression ( $iRS =$   
155  $CTR - STD$ ) and index of prediction error ( $iPE = DEV - CTR$ ). Therefore, the iMM quantifies the  
156 total mismatch response; the iRS estimates the portion of the mismatch response that can be  
157 accounted for by the adaptation hypothesis; and the iPE reveals the component of the mismatch  
158 response that can only correspond to genuine deviance detection (according to the sensory-memory  
159 hypothesis) or to PE signaling (under a predictive processing interpretation).

160

161 In the following sections, we present the results of recording from 83 sound-driven multiunits across  
162 all mPFC fields (M2: 25; ACC: 20; PL: 20; IL: 18; Fig 2A), where we were able to test a total of 384  
163 tones at every aforementioned condition (M2: 132; ACC: 90; PL: 81; IL: 81), between 1 and 8 per  
164 multiunit (Fig 2C). Although the frequency-response areas (FRAs) appeared unstructured (Fig 2B),  
165 these multiunits exhibited robust responses to many combinations of frequency (0.6–42.5 kHz) and  
166 intensity (25–70 dB SPL) during experimental testing (Fig 2C and D). This indicates that the  
167 auditory sensitivity of mPFC neurons is fundamentally driven by the contextual characteristics of  
168 auditory stimulation, rather than its spectral properties.

169

## 170 **Context-dependent responses and large PE signals across all mPFC fields**

171 First, we compared the responses elicited by the many-standards and the cascade sequences.  
172 Similarly to previous works studying the rat AC [39] and the human MMN [46], we found no  
173 significant differences between *CTR random*, *CTR ascending* and *CTR descending* (Fig 1D), neither  
174 within each mPFC field nor for our whole sample (Wilcoxon signed-rank test). Therefore, we used  
175 the cascade-evoked responses as CTR for the rest of analyses, based on the theoretical advantages  
176 that the cascade sequence offers over the many-standards sequence to control for effects of spectral  
177 processing (see *Oddball paradigm controls* for a detailed rationale) [43].

178

179 DEV evoked the most robust discharges across all mPFC fields, usually more than doubling the  
 180 responses elicited by any other condition (Fig 2C and D). Median normalized response to DEV was  
 181 significantly larger than that to STD or CTR (within-field multiple comparisons Friedman test; Table  
 182 1; Fig 3B). Only in M2 the difference in the responses to CTR and STD reached statistical  
 183 significance ( $p = 0.0490$ ), whereas the distribution of CTR and STD responses proved to be too  
 184 overlapped in the rest of mPFC fields (within-field multiple comparisons Friedman test; Table 1; Fig  
 185 3B). The IMM revealed very large and significant mismatch responses coming from all the mPFC  
 186 fields (within-field multiple comparisons Friedman test; Table 1; Fig 3C, in magenta). Most of these  
 187 robust mismatch responses could be accounted for by strong PE signaling, as high iPE values were  
 188 very significant and very close to those of the IMM (within-field multiple comparisons Friedman  
 189 test; Table 1; Fig 3C, in orange). Conversely, iRS values were very low in general, and only M2  
 190 showed a median iRS significantly different from zero (within-field multiple comparisons Friedman  
 191 test; Table 1; Fig 3C, in cyan). Remarkably, the values of each index did not differ significantly  
 192 between mPFC fields (Kruskal-Wallis test with Dunn-Sidak correction;  $p > 0.05$  for all comparisons  
 193 with the 3 indices), so a hierarchical relationship between mPFC fields during the processing of  
 194 auditory contexts cannot be established in our sample.

195

|                                       | <b>M2</b> | <b>ACC</b> | <b>PL</b> | <b>IL</b> |
|---------------------------------------|-----------|------------|-----------|-----------|
| Number of multiunits                  | 25        | 20         | 20        | 18        |
| Tested frequencies                    | 132       | 90         | 81        | 81        |
| <b>Median raw spike counts</b>        |           |            |           |           |
| DEV                                   | 8.6875    | 4.8125     | 6.4750    | 6.0750    |
| STD                                   | 2.7000    | 1.5500     | 1.7750    | 1.1750    |
| CTR                                   | 2.9875    | 1.7000     | 2.5750    | 2.4250    |
| <b>Median normalized spike counts</b> |           |            |           |           |
| DEV                                   | 0.8693    | 0.8653     | 0.8951    | 0.8511    |
| STD                                   | 0.2751    | 0.2280     | 0.2583    | 0.2202    |



|                                                   |                                  |                                  |                                  |                                  |
|---------------------------------------------------|----------------------------------|----------------------------------|----------------------------------|----------------------------------|
| CTR                                               | 0.3389                           | 0.3189                           | 0.3225                           | 0.3926                           |
| Raw spike count differences, Friedman test        |                                  |                                  |                                  |                                  |
| DEV – STD                                         | 5.9875                           | 3.2625                           | 4.7000                           | 4.9000                           |
| <i>p</i> -value                                   | <b>3.4655 × 10<sup>-26</sup></b> | <b>2.6737 × 10<sup>-14</sup></b> | <b>4.5502 × 10<sup>-20</sup></b> | <b>3.8146 × 10<sup>-16</sup></b> |
| DEV – CTR                                         | 5.7000                           | 3.1125                           | 3.9000                           | 3.6500                           |
| <i>p</i> -value                                   | <b>6.9089 × 10<sup>-18</sup></b> | <b>6.3210 × 10<sup>-14</sup></b> | <b>6.0892 × 10<sup>-14</sup></b> | <b>3.8465 × 10<sup>-11</sup></b> |
| CTR – STD                                         | 0.2875                           | 0.1500                           | 0.8000                           | 1.250                            |
| <i>p</i> -value                                   | <b>0.0490</b>                    | 0.9109                           | 0.0953                           | 0.1249                           |
| Normalized spike count differences, Friedman test |                                  |                                  |                                  |                                  |
| iMM = DEV – STD                                   | 0.5941                           | 0.6373                           | 0.6368                           | 0.6310                           |
| <i>p</i> -value                                   | <b>3.4655 × 10<sup>-26</sup></b> | <b>2.6737 × 10<sup>-14</sup></b> | <b>4.5502 × 10<sup>-20</sup></b> | <b>3.8146 × 10<sup>-16</sup></b> |
| iPE = DEV – CTR                                   | 0.5304                           | 0.5464                           | 0.5726                           | 0.4586                           |
| <i>p</i> -value                                   | <b>6.9089 × 10<sup>-18</sup></b> | <b>6.3210 × 10<sup>-14</sup></b> | <b>6.0892 × 10<sup>-14</sup></b> | <b>3.8465 × 10<sup>-11</sup></b> |
| iRS = CTR – STD                                   | 0.0638                           | 0.0910                           | 0.0642                           | 0.1724                           |
| <i>p</i> -value                                   | <b>0.0490</b>                    | 0.9109                           | 0.0953                           | 0.1249                           |

196 **Table 1.** Median spike counts and indices in each mPFC field. Significant *p*-values are highlighted.

197 According to ‘standard’ implementations of cortical predictive processing [47], error units  
 198 forwarding PEs are located in superficial layers (II/III), while expectations are encoded by prediction  
 199 units found in the deep layers (V/VI). Index variations could be expected between superficial and  
 200 deep mPFC layers, so we attempted to pinpoint the laminar location of our multiunits by means of  
 201 electrolytic lesions (Fig 2A). Given that such lesions can cover diameters of about 300 μm, half of  
 202 our multiunit sample had to be excluded from this analysis, as our conservative histological  
 203 assessment deemed their location inconclusive. Nevertheless, this restrictive histological analysis  
 204 allowed us to comfortably locate the rest of our multiunit recordings within layers II/III (19  
 205 multiunits, 92 tones) or layers V/VI (22 multiunits, 113 tones). Unfortunately, we could not find any  
 206 significant index changes between II/III and V/VI groups, neither within each mPFC field nor for the  
 207 whole sample (Wilcoxon signed-rank test).

208

## 209 **Fast repetition suppression of the response to predictable auditory input**

210 To explore the dynamics of the mismatch responses over time for each mPFC field, we averaged the  
211 firing rate to DEV, CTR and STD in each trial of the sequence across all multiunit recordings. The  
212 effect of the position of a stimulus within its sequence is shown in Fig 3D, where each dot indicates  
213 the mean response to a given condition, when the position of the trial within the sequence  
214 corresponds to the one indicated in the x-axis. A power-law model of 3 parameters provided the best  
215 fit of the STD responses per mPFC field:  $y(t) = at^b + c$  (adjusted  $R^2$ , M2: 0.358; ACC: 0.259; PL:  
216 0.076; IL: 0.380). Across trials, DEV events maintained a high firing rate (adjusted  $R^2$ , M2: -0.054;  
217 ACC: 0.489; PL: 0.213; IL: -0.054). On the other hand, CTR responses showed repetition  
218 suppression, although not as strong and prompt as the STD (adjusted  $R^2$ , M2: 0.1864; ACC: 0.324;  
219 PL: 0.187; IL: 0.245). Only the repetition suppression to STD manifested very fast and robustly  
220 across trials in all mPFC fields ( $b$  parameter [with 95% confidence intervals]: M2, -1.373 [-1.656 to -  
221 1.089]; ACC, -2.247 [-3.138 to -1.357]; PL, -1.951 [-3.064 to -0.839]; IL, -2.210 [-2.862 to -1.557]).  
222 Only one repetition sufficed to yield >50% decay of the initial response. Another repetition  
223 attenuated the STD response to levels comparable to the steady-state, where the firing rate remained  
224 constant until the end of the sequence ( $c$  parameter [with 95% confidence intervals]: M2,  
225 0.296 [0.290 to 0.302]; ACC, 0.337 [0.330 to 0.344]; PL, 0.318 [0.309 to 0.326]; IL, 0.302 [0.293 to  
226 0.312]). These findings mean that only two repetitions are needed to generate a precise repetition  
227 expectation that suppresses this kind of redundancy in the mPFC.

228

## 229 **Microscopic and mesoscopic measurements of PE signals coincide in time**

230 To identify the overall response patterns of each mPFC field, we computed the population temporal  
231 dynamics of the average firing rate as normalized spike-density functions. Consistently across all  
232 fields, mPFC multiunits exhibited extremely robust and long-lasting firing to DEV (Fig 4B, in red).  
233 DEV responses showed very long latencies, needing more than 100 ms post-stimulus onset to

234 become discernible from spontaneous activity. Then, DEV firing increased slowly over a course of  
235 more than 200 ms before peaking (DEV spike-density function peak latency, M2: 377 ms; ACC: 396  
236 ms; PL: 464 ms; IL: 352 ms). The peak latency in response to DEV stimuli was longer in the PL than  
237 in the other mPFC fields (Wilcoxon rank-sum test, PL versus M2:  $p = 4.43 \times 10^{-04}$ , PL versus ACC:  
238  $p = 4.48 \times 10^{-04}$ , PL versus IL:  $p = 1.50 \times 10^{-04}$ ; whereas M2 versus ACC:  $p = 0.729$ , M2 versus IL  $p$   
239  $= 0.490$ , ACC versus IL  $p = 0.756$ ). This DEV-evoked activity continued in decay, well into the  
240 following STD trial of the oddball paradigm. CTR responses tended to follow these same patterns,  
241 although with less robust responses and longer latencies (CTR spike-density function peak latency,  
242 M2: 516 ms; ACC: 428 ms; PL: 523 ms; IL: 446 ms), such that the response evoked by the previous  
243 tone in the cascade sequence is still visible in the current trial (Fig 4B, in green). Finally, the STD  
244 did not evoke any robust responses or clear peaks (Fig 4B, in blue).

245

246 To analyze PE signaling within each field, we computed the average iPE for each tested tone  
247 recorded in 35 time-windows of 20 ms width in the range of -50 to 650 ms around tone onset. We  
248 tested the indices for significance against zero (Wilcoxon signed-rank test, FDR-corrected for 35  
249 comparisons,  $p < 0.05$ ). iPE started to be significant at 120 ms in the PL, followed by the IL at 140  
250 ms and later by the M2 and ACC at 180 ms post-stimulus onset. In all mPFC fields, iPE signals  
251 exceeded half of the index maximum for a sustained length, from about 250 ms post-stimulus onset  
252 to the end of the analysis window, beyond 600 ms (Fig 4D, in orange).

253

254 The extended period of DEV-evoked spiking activity could be the neuronal trace of an updating  
255 process of the internal representation by means of PE signals [24,48], as it has been suggested for the  
256 human MMN. However, spike responses reflect local activity at the neuron level, whereas the MMN  
257 is a large-scale brain potential. One reasonable way of bridging this gap is to probe the correlation  
258 between PEs present in the microscopic level with those present within the LFPs [38,39], which

259 constitute the average synaptic activity in local cortical circuits [49]. Hence, we averaged LFP  
260 responses for each condition and station (Fig 4C), as well as the difference between DEV and CTR  
261 conditions (Fig 4D, in black). We termed this difference as ‘prediction error potential’:  $PE-$   
262  $LFP = LFP_{DEV} - LFP_{CTR}$ . Indeed, LFP analysis confirmed that the robustness of DEV responses was  
263 also clearly observable at the mesoscopic level, in stark contrast to the feeble or non-existent  
264 modulations yielded by CTR and STD (Fig 4C). Significant PE-LFP modulations were also  
265 detectable in all mPFC fields, beginning at 147 ms after change onset in IL and PL, followed by M2  
266 at 167 ms and considerably later by ACC at 275 ms (paired  $t$ -test, FDR-corrected for 428  
267 comparisons,  $p < 0.05$ ; Fig 4D, thick black line). Most remarkably, these PE-LFP modulations occur  
268 within the time window where iPE values become significant (Fig 4D, compare the distribution of  
269 orange asterisks and thick black lines over time), unveiling a correlation between the PE signals  
270 recorded at microscopic and mesoscopic levels.

271

## 272 **Strong responses to unpredictable sounds over a background of silence**

273 In a subset of 9 multiunits (6 rats) from the previously reported data, we tested 39 frequency tones  
274 while muting the STD tones of the oddball paradigm, hence obtaining a condition where DEV was  
275 presented ‘alone’ (Fig 5A). *DEV alone* tones were separated by silent periods of a minimum of 1.925  
276 s, equivalent to 3 silenced STD. DEV and DEV alone median spike counts and response patterns did  
277 not differ significantly (multiple comparisons Friedman test; Fig 5B and C). Although some  
278 differences could be observed in the modulations of their LFPs (Fig 5D), these divergencies are  
279 negligible as they failed to reach statistical significance (paired  $t$ -test, FDR-corrected for 428  
280 comparisons; Fig 5E). Thus, the responses of mPFC to unexpected tones are similar, regardless of  
281 whether they are presented over a background of silence or interrupting a regular train of other  
282 repetitive tones.

283

## 284 **Comparisons between the mPFC and the AC in the rat brain**

285 In order to achieve a more general picture of auditory deviance detection in the rat brain, we also  
286 used the data set of a previous work from our lab with similar methodology [39] to study the  
287 differences between the mismatch responses in the mPFC and the auditory system. In our previous  
288 study, the adaptation hypothesis could only be endorsed in the subcortical lemniscal pathway,  
289 whereas predictive activity was identified all along the nonlemniscal pathway and the AC [21,39].  
290 Interestingly, the relative magnitude of mismatch responses along all these auditory centers was  
291 comparable, as reflected by their respective median iMM values: 0.49 in the nonlemniscal inferior  
292 colliculus (IC), 0.52 in the nonlemniscal medial geniculate body (MGB), 0.50 in the lemniscal (or  
293 primary) AC and 0.60 in the nonlemniscal (or nonprimary) AC. This is also the case in the mPFC,  
294 with a median iMM value of 0.59 (Wilcoxon signed-rank test,  $p = 6.81 \times 10^{-57}$ ).

295 However, the composition of these mismatch responses was fundamentally distinct in the PFC as  
296 compared to the auditory system. Repetition suppression was the dominant effect contributing to the  
297 mismatch responses of all auditory neurons: 0.46 in both the nonlemniscal IC and MGB, 0.39 in the  
298 lemniscal AC and 0.33 in the nonlemniscal AC. Conversely, the influence of frequency-specific  
299 effects in mPFC neurons was almost irrelevant, with a median iRS value of 0.06 (Wilcoxon signed-  
300 rank test,  $p = 9.75 \times 10^{-06}$ ). On the other hand, median iPE values are rather low along the auditory  
301 system: 0.03 in the nonlemniscal IC, 0.06 in the nonlemniscal MGB, 0.11 in the lemniscal AC and  
302 0.27 in the nonlemniscal AC. AC neurons exhibit the most prominent PE signaling, accounting for  
303 22% of the mismatch response in the lemniscal AC and 45% in the nonlemniscal AC. In contrast, PE  
304 signaling in mPFC neurons is dominant, with a median iPE value of 0.53 (Wilcoxon signed-rank test,  
305  $p = 5.73 \times 10^{-55}$ ) that accounts for 90% of the total mismatch response (Fig 6A). Thus, spectral  
306 properties were the main subject of mismatch responses in the auditory system, while mPFC  
307 processing seemed to be abstracted from them.

308 Statistical comparisons between AC regions and mPFC fields confirmed the general trends described  
309 above. The magnitude of the iMM exhibited no significant differences (Kruskal-Wallis test with  
310 Dunn-Sidak correction;  $p > 0.05$  for all comparisons), but the iPE component grew significantly  
311 from the AC to the mPFC (Kruskal-Wallis test with Dunn-Sidak correction; lemniscal AC versus  
312 M2:  $p = 4.50 \times 10^{-14}$ , versus ACC:  $p = 1.07 \times 10^{-11}$ , versus PL:  $p = 4.10 \times 10^{-12}$ , versus IL:  $p = 1.09 \times$   
313  $10^{-08}$ ; nonlemniscal AC versus M2:  $p = 3.93 \times 10^{-05}$ , versus ACC:  $p = 2.12 \times 10^{-04}$ , versus PL:  $p =$   
314  $6.74 \times 10^{-05}$ , versus IL:  $p = 0.011$ ) to the detriment of iRS, whose proportion drastically shrank to a  
315 rather insubstantial contribution to the mismatch response (Kruskal-Wallis test with Dunn-Sidak  
316 correction; lemniscal AC versus M2:  $p = 1.69 \times 10^{-12}$ , versus ACC:  $p = 1.11 \times 10^{-12}$ , versus PL:  $p =$   
317  $2.61 \times 10^{-10}$ , versus IL:  $p = 3.12 \times 10^{-06}$ ; nonlemniscal AC versus M2:  $p = 7.46 \times 10^{-08}$ , versus ACC:  
318  $p = 1.76 \times 10^{-08}$ , versus PL:  $p = 1.29 \times 10^{-06}$ , versus IL:  $p = 0.003$ ). This demonstrates that the nature  
319 of mismatch responses in the AC and the PFC is fundamentally different, as predicted by the  
320 sensory-memory and the predictive processing hypotheses (Fig 6A).

321 Temporal dynamics also agree with the abovementioned hypotheses, with the extremely dissimilar  
322 latencies observed in the AC and the mPFC point at a sequential processing. Both DEV- and CTR-  
323 evoked spiking activity in the AC peaks and starts decaying well before the 75-ms tone has even  
324 ended [39]. In stark contrast to the fast AC response, the spiking activity of our whole mPFC  
325 multiunit sample began to slowly rise after 150 ms post-stimulus onset, and took an impressive 462  
326 ms to peak to the DEV and 517 ms to peak to the CTR (Fig 6B). In fact, the entire peristimulus  
327 histogram of a nonlemniscal AC neuron can be represented within the latency of the auditory-evoked  
328 responses measured in mPFC neurons (Fig 6C). Regarding the LFPs, an early PE-LFP becomes  
329 significant in the AC at about 40 ms and vanishes by 160 ms post-stimulus onset, whereas the PE-  
330 LFP in our mPFC sample started at 140 ms and lingered with significant magnitudes up to 623 ms  
331 post-stimulus onset. Both AC and mPFC PE-LFPs coincided precisely with the time course of their

332 respective significant iPE values in spiking activity, thus confirming the PE signaling asynchrony at  
333 both microscopic and mesoscopic levels (Fig 6D).

334

335 According to data from previous studies in anesthetized rats [38,39], the contrast between AC and  
336 mPFC processing is also very apparent in the time needed to explain away STD input. To suppress  
337 their initial response to the STD by half, lemniscal AC neurons need 7 repetitions, and nonlemniscal  
338 AC neurons 2 repetitions, whereas mPFC neurons only need 1 repetition (Fig 6E, cyan arrow). To  
339 reach a steady-state level of maximum attenuation of the auditory-evoked response takes more than  
340 the initial 9 STD repetitions in the lemniscal AC, 5 repetitions in the nonlemniscal AC, but only 2 in  
341 the mPFC (Fig 6E, dashed lines). This finding rules out the possibility that suppressive effects on the  
342 STD could be simply inherited or amplified downstream from the auditory system. On the contrary,  
343 the capacity of the mPFC to explain away redundant input more efficiently than the AC supports the  
344 predictive processing hypothesis: mPFC expectations are imposed top-down on the AC, thereby  
345 influencing earlier stages of auditory processing.

346

## 347 **Discussion**

348 In this study we recorded multiunit responses in the rat mPFC to the auditory oddball paradigm and  
349 its no-repetition controls, i.e., the many-standards and cascade sequences (Fig 1). We did not observe  
350 meaningful differences in the strength of the evoked responses across the 4 mPFC fields or between  
351 superficial and deep cortical layers. Unpredictable auditory stimulation prompted robust responses,  
352 as compared to the weak (or even absent) activity elicited by sounds that could be expected (Figs 2,  
353 3, 4 and 5). The time course of the mismatch responses found in the spiking activity and LPFs of the  
354 mPFC (Fig 4C and D) correlated with that of the frontal sources of the large-scale MMN-like  
355 potentials from the rat brain [40,44,45]. Most importantly, our data indicated that mismatch

356 responses of the mPFC are almost purely comprised of PE signaling activity (Figs 3C and 4D), in  
357 contrast to the mismatch responses recorded along the auditory system (Fig 6A) [39].

358

### 359 **Unpredictability drives auditory responsiveness in the PFC**

360 Despite the alleged advantages of the cascade over the many-standards sequence for controlling  
361 repetition effects during the oddball paradigm [21,43], we did not find any statistically significant  
362 differences between the two no-repetition controls in the mPFC for the tested parameters. This goes  
363 in line with evidence from the auditory system, where the responses evoked by both no-repetition  
364 controls were also comparable in AC, MGB and IC of anaesthetized rats [39]. Such similarity  
365 between no-repetition controls tends to be the usual observation in human MMN studies as well  
366 [46,50,51]. This suggests that both no-repetition controls are probably processed as a regular  
367 succession of pitch alternations, without distinguishing whether those alternations of pitch are  
368 random, ascending or descending. Both controls seemingly generate an ‘alternation expectation’  
369 capable of suppressing to a certain extent the auditory-evoked responses in the mPFC, but without  
370 inducing stimulus-specific effects of repetition suppression (like STD does). Therefore, the many-  
371 standard and the cascade sequences work as largely equivalent CTRs for the oddball paradigm.

372

373 Spiking activity in the rat mPFC peaked earlier and higher when evoked by unexpected auditory  
374 stimulation, i.e., DEV and DEV alone (which did not differ significantly from each other), more than  
375 doubling or even tripling in magnitude the spike response elicited by predictable conditions, i.e, CTR  
376 and STD (which only differed significantly from each other in M2; Table 1; Figs 3B and D, 4B, 5B  
377 and C). DEV response dominance was even more pronounced in the LFP analysis, where unexpected  
378 DEV and DEV alone conditions prompted robust local field fluctuations whereas the impact of  
379 predictable CTR and STD stimulation was negligible (Figs 4C and 5D). We found the same response  
380 unbalance between unpredictable and predictable stimulation conditions in all mPFC fields,



381 regardless of whether recordings were performed in superficial or deep cortical layers. The robust  
382 mismatch between mPFC responses to unexpected and predictable conditions resulted in similarly  
383 high values of iMM ( $DEV - STD$ ) and iPE ( $DEV - CTR$ ). Conversely, the meager or insignificant  
384 values of iRS ( $CTR - STD$ ) indicate that the influence of frequency-specific effects is rather  
385 irrelevant in the mPFC (Table 1; Figs 1B, 3C and 6A). Hence, the mismatch responses evoked in the  
386 mPFC by the auditory oddball paradigm are better explained as pure PE signaling (for more detailed  
387 rationale, see *Oddball paradigm controls*).

388

389 Reports from other frontal sources have found comparable results despite using different methods,  
390 recording techniques and model species. Spiking responses in the lateral and ventral orbitofrontal  
391 cortex of anesthetized and awake mice also found a great predominance of DEV responses over STD  
392 responses [52]. Epidural electrodes placed over the frontal cortices of awake and freely-moving rats  
393 [40,45] recorded stronger ERPs to DEV than to CTR or STD. In awake macaques, one study using  
394 multichannel electrodes placed in the dorsolateral PFC found larger responses to DEV than to STD  
395 [53], while another using ECoG found strong mismatch responses in the PFC to deviant changes  
396 within a roving-standard paradigm, but not to repetitions or the many-standards control [54].  
397 Regarding invasive research in human patients, ECoG studies have consistently proven that, in  
398 contrast with the AC, the PFC ceases responding to DEV when its occurrence can be expected  
399 [34,37,55]. Although the different prefrontal locations analyzed in the aforementioned studies across  
400 rodents, macaques and humans should not be hastily regarded as direct homologues [56], all these  
401 works agree in that the key driver of auditory responsiveness in the PFC is unpredictability.

402

### 403 **The neuronal substrate of MMN-like potentials in the rat brain**

404 According to our results, PE spiking activity starts appearing at 120 ms post-stimulus onset. About  
405 100 ms later, PE signaling becomes very prominent ( $iPE > 0.5$ ), where it remains more or less

406 sustained beyond 600 ms post-stimulus onset, even after the next tone in the sequence has been  
407 presented (Fig 4D and 6D, in orange). Most remarkably, such time distribution of the iPE spans  
408 enough to include all significant PE-LFP modulations in every mPFC field (Fig 4D and 6D, in  
409 black). Therefore, the time course of PE signaling observed in the mPFC at microscopic level  
410 coincide in time with that observed at mesoscopic level.

411  
412 At macroscopic level, ERPs from awake rats exhibited strong mismatch responses beginning about  
413 40 ms post-stimulus onset [40,44,45]. Similarly, both our spiking activity and LFP analyses  
414 confirmed that early PE signaling starts about 40 ms post-stimulus onset in the AC until about 150  
415 ms, when the PFC takes over and continues PE signaling beyond 600 ms post-stimulus onset (Fig 6B  
416 and D). Moreover, the strongest MMN-like potentials are reported in the time window of 100–500  
417 ms [40,44,45], precisely coinciding with the period where we registered the most intense PE spiking  
418 activity ( $iPE > 0.5$ ), as well as the highest peaks in the PE-LFP (Figs 4D and 6D). Thus, our data  
419 allows to correlate the microscopic, mesoscopic, and macroscopic levels at which PE signaling can  
420 be detected in the rat PFC. Since the so-called MMN-like potentials are regarded as the rat analog of  
421 the human MMN [41], our results could model the possible neuronal substrate of the frontal MMN  
422 generators.

## 423 424 **Different nature of PE signaling in the AC and the PFC**

425 Compared to our previous work in the AC [38,39], evoked responses to pure tones in the mPFC were  
426 relatively rare and difficult to find. Multiunits that responded to stochastic bursts of white noise  
427 during search then exhibited unstructured FRAs, where a concrete receptive field could not possibly  
428 be determined (Fig 2B). However, these same multiunits fired consistently in response to many  
429 combinations of frequencies and intensities when the tested pure tones were embedded within an  
430 experimental sequence (Fig 2C and D). Thus, whereas AC processing was clearly driven by the

431 spectral properties of auditory stimulation, auditory sensitivity in mPFC neurons seemed solely  
432 dependent on contextual or abstract characteristics. In the same vein, a previous study of spiking  
433 activity and LFPs in alert macaques also found stimulus specificity in the auditory-evoked responses  
434 of the AC, but not the dorsolateral PFC [53]. In addition, frequency-specific effects present in the  
435 AC within the train of STD or after a DEV were not apparent in the dorsolateral PFC of those alert  
436 macaques [53]. Similarly, whereas the iRS in the rat AC can still account for more than half of the  
437 mismatch responses [39], at the rat mPFC we found scant or even not significant values of iRS (Fig  
438 6A), thus dismissing any relevant spectral influences in PFC processing.

439  
440 Our data show that while iMM values in the AC and the mPFC of anesthetized rats are analogous,  
441 iPE values are significantly different (Fig 6A). This means that the nature of mismatch responses at  
442 the AC is distinct from those at the PFC, despite been paired in their relative magnitude. For this  
443 reason, generators at both the AC and the PFC are important contributors to the MMN, but their  
444 contributions are fundamentally different in nature, something that has been advocated since the  
445 classic sensory-memory interpretation of the human MMN [4,9,10,12] and has also been inherited by  
446 the more modern predictive processing framework [20,23]. Given that the iPE can account for 90%  
447 of the iMM value, and that in some most mPFC fields both indices are not even significantly  
448 different, prefrontal mismatch responses can be safely interpreted as genuine deviance detection (in  
449 classic terminology) or as pure PE signaling (in predictive processing terminology).

450  
451 Following this logic, the mPFC would be generating an abstracted mismatch response de novo,  
452 signaling ‘deviance’ or a ‘PE’ without reflecting the low-level spectral properties of the driving  
453 acoustic stimuli, which have been already represented at earlier processing stages within the auditory  
454 system [20,39]. This interpretation is consistent with the huge latency disparities observed between  
455 the AC and the mPFC in our anesthetized rats. Whereas AC responses to pure tones take just a few

456 milliseconds to emerge [38,39], evoked responses in the mPFC take hundreds of milliseconds to  
457 appear, both at spike activity (Figs 2D, 4B, 5C and 6B) and LFP recordings (Figs 4C and D, 5D and  
458 E, 6D). Prefrontal response delays over 100 ms with respect to the AC have also been reported in the  
459 lateral and ventral orbitofrontal cortex of anesthetized and awaked mice [52], as well as in the  
460 dorsolateral PFC of alert macaques [53]. Entire AC responses could fit within the latency of the  
461 auditory-evoked responses found in the PFC (Fig 6B and C). This suggests that AC and PFC  
462 processing occur to a certain extent in sequential manner, as described by both the classic sensory-  
463 memory [4] and the predictive processing hypotheses [30] of the generation of the MMN. First,  
464 acoustic deviances from spectral regularities must be detected at the AC (temporal sources), and only  
465 after that, the PFC (frontal sources) can identify global and behaviorally relevant deviations from  
466 more abstract internal representations.

467

468 Further evidence of the hierarchical relationship between the AC and the PFC could be found in the  
469 notable differences between the time each cortical region needs to explain redundant STD input  
470 away. According to our previous studies [38,39], neurons in primary or lemniscal AC need 7  
471 repetitions to suppress their initial auditory-evoked response by half, and 2 repetitions in the  
472 nonprimary or nonlemniscal AC (Fig 6E, in grey). By contrast, only 1 repetition was enough for the  
473 initial auditory-evoked response in the mPFC to drop between >50% and >70%, and a second  
474 repetition to reach maximum suppression levels (Fig 6E, in black). Similar suppressive dynamics  
475 were reported in the orbitofrontal cortex of anesthetized and awake mice [52], in the dorsolateral  
476 PFC of alert macaques [53], as well as in human frontal sources [22].

477

478 Given that the PFC responds much later to sound but suppresses redundant auditory input more  
479 efficiently than the AC, the mismatch responses observed at the PFC cannot be simply inherited or  
480 amplified downstream from the auditory system. The inverse hierarchical arrangement, proposed by

481 the predictive processing hypothesis [30], is thereby more plausible. The PFC is not part of the  
482 auditory system; in fact, it is not a sensory processor per se, but rather an executive center. In more  
483 natural conditions, the PFC most likely integrates manifold inputs to generate very complex cross-  
484 modality sensorimotor representations [57,58]. These abstract internal representations at the PFC  
485 could in turn guide in top-down manner the processing at lower-level systems, hyperparameterizing  
486 the more concrete operations carried in their respective (sensory) modalities, and thus increasing  
487 overall processing efficiency. In other words, the gestalt acquired at the PFC could be feedbacked to  
488 the AC, generating specific expectations in the spectral domain (the native format of AC), but  
489 ultimately regarding higher-order properties (such as interstimulus relationships, auditory tokens or  
490 sequence structures) that could have not been computed otherwise in the local AC circuitry. This top-  
491 down predictive activity would exert an inhibitory influence on AC responses whenever certain  
492 auditory input is already accounted for by the prefrontal gestalt, but any unpredicted information  
493 would be conveyed bottom-up in a PE to update the internal representation at the PFC. Thus,  
494 hierarchical predictive processing can explain why the PFC exhibits longer latencies than the AC,  
495 while also performing more effective and overarching expectation suppression, capable of fully  
496 explaining away STD input, and even CTR input. As soon as auditory information becomes  
497 redundant to the big picture, it stops reaching the PFC, avoiding cognitive overload, and saving high-  
498 order processing resources for more fruitful endeavors.

499

### 500 **Subcortical middle players could relay PE signals to the PFC**

501 Finally, it is worth mentioning that most accounts of deviance detection and PE signaling tend to  
502 over-represent cortical sources, downplaying the role of subcortical contributions. Since the MMN is  
503 recorded from the human scalp, the fronto-temporal cortical network is more readily accessible for  
504 study. The predictive processing framework is also eminently focused on cortical processing  
505 [27,47,59]. However, the important contribution of subcortical nuclei is becoming ever clearer in

506 recent literature. Regarding the auditory system, no-repetition controls revealed that SSA could not  
507 fully account for the mismatch responses found in the nonlemniscal divisions of the IC and the MGB  
508 of the anesthetized rats and awake mice. Hence, subcortical auditory nuclei seem to constitute the  
509 first levels of the predictive processing hierarchy which is ultimately responsible for auditory  
510 deviance detection [39,60,61].

511

512 Human brain research has also identified auditory mismatch signals from subcortical nuclei outside  
513 the auditory system, such as the nucleus accumbens [62], the hippocampus [63] or the amygdala  
514 [64,65]. Evidence from animal models has been able to confirm these subcortical signals and  
515 describe locations and time courses more precisely. Auditory mismatch responses took about 20 ms  
516 to appear in the CA1 region of the hippocampus of freely-moving mice [66], and 30-60 ms to show  
517 in the basolateral amygdala of alert macaques [53]. Furthermore, like in the PFC, mismatch  
518 responses in the basolateral amygdala did not exhibit stimulus-dependent effects [53]. Minding the  
519 different model species, these time delays would place the hippocampus and the amygdala right  
520 between the response windows observed in the auditory pathway and those in the PFC.

521

522 This could provide a potential explanation for the lack of significant differences between mismatch  
523 responses across mPFC fields, despite been quite distinct from each other. The mismatch responses  
524 we recorded at the rat mPFC resembled to those recorded at the mouse orbitofrontal cortex [52] and  
525 the macaque dorsolateral PFC [53]. It is possible that non-auditory subcortical nuclei such as the  
526 hippocampus or the amygdala could compute PEs and then broadcast that signal all over the PFC for  
527 further processing and integration. Indeed, a very recent study has demonstrated that the emergence  
528 of robust and long-lasting mismatch responses in the mouse orbitofrontal cortex is directly controlled  
529 from the nonlemniscal MGB through the basolateral amygdala [52]. Therefore, all these auditory and  
530 non-auditory subcortical nuclei could be fundamental middle players in the automatic process of

531 deviance detection and PE signaling reflected in the MMN. This is a possibility that should be  
532 further explored in future studies.

533

## 534 **Limitations**

535 All theoretical implementations of the predictive processing hypothesis assume that expectations and  
536 PEs are computed by separated neuronal types distributed across distinct cortical layers, which  
537 should result in characteristic laminar profiles [47,59]. Unfortunately, we have not been able to  
538 identify any significant response differences between superficial and deep layers of the mPFC, in  
539 contrast to what predictive processing models expect. This lack of differences between layers could  
540 be due to the unspecific nature of our multiunit measurements. Extracellular recordings can capture  
541 the evoked responses of several neurons within a considerable volume of up to hundreds of  $\mu\text{m}^3$   
542 around the tip of the electrode. The recorded activity does not always allow for spike sorting and  
543 waveform analyses to isolate and assign putative neuronal types to the single units contained within  
544 one multiunit recording [67], as it was the case in the present study.

545

546 Nevertheless, it is worth mentioning that the concrete role of neuronal types and their laminar  
547 distribution is still a subject of intense debate within the predictive processing framework. Several  
548 possible but conflicting implementations have been proposed [47,68–71], and empirical evidence  
549 from human research is mixed (for an in-depth discussion, see [48]). In fact, previous attempts from  
550 our lab and others to find a laminar distribution of mismatch responses which fitted the standard  
551 implementation of cortical predictive processing [47] also failed in the AC of rats and mice  
552 [38,39,66,72]. Therefore, focused research efforts will be needed to disambiguate this issue in the  
553 future.

554

555 Lastly, the MMN is a notorious obligatory component of the human ERP, remaining persistent in  
556 situations where consciousness is absent, such as during sleep [73,74], anesthesia [75,76] or even  
557 coma [77,78]. Hence, the fact that we have been able to record very robust mismatch responses in the  
558 rat mPFC during anesthesia further strengthens the link between our data and MMN evidence from  
559 human research. Moreover, previous studies of mismatch responses in both the auditory system and  
560 the PFC of rodents did not find dramatic differences between anesthetized and awake preparations  
561 [39,52,79,80]. Notwithstanding, the use of anesthesia is always a limiting factor that must be minded  
562 when comparing these data with those obtained from awake preparations, or when trying to  
563 extrapolate possible behavioral implications from the conclusions presented in our study.

564

## 565 **Materials and methods**

### 566 **Ethics statement**

567 All methodological procedures were approved by the Bioethics Committee for Animal Care of the  
568 University of Salamanca (USAL-ID-195) and performed in compliance with the standards of the  
569 European Convention ETS 123, the European Union Directive 2010/63/EU, and the Spanish Royal  
570 Decree 53/2013 for the use of animals in scientific research.

571

### 572 **Surgical procedures**

573 We conducted experiments on 33 female Long-Evans rats aged 9–17 weeks with body weights  
574 between 200–330 g. Rats were anesthetized with urethane (1.9 g/kg, intraperitoneal). To ensure a  
575 stable deep anesthetic level, we administered supplementary doses of urethane (~0.5 g/kg,  
576 intraperitoneal) when the corneal or pedal withdrawal reflexes were present. Urethane preserves  
577 balanced neural activity better than other anesthetic agents having a modest balanced effect on  
578 inhibitory and excitatory synapses [81]. Normal hearing was verified with auditory brainstem  
579 responses recorded with subcutaneous needle electrodes, using a RZ6 Multi I/O Processor (Tucker-



580 Davis Technologies, TDT) and processed with BioSig software (TDT), using 0.1 ms clicks presented  
581 at a rate of 21/s, delivered monaurally to the right ear in 10 dB steps, from 10 to 90 decibels of sound  
582 pressure level (dB SPL), using a close-field speaker. Every 10 hours, we administered 0.1 mg/kg of  
583 atropine sulfate (subcutaneous), 0.25 mg/kg of dexamethasone (intramuscular) and 5–10 ml of  
584 glucosaline solution (subcutaneous) to ameliorate the presence of bronchial secretions, brain edema  
585 and prevent dehydration, respectively. Animals were artificially ventilated through a tracheal cannula  
586 with monitored expiratory [CO<sub>2</sub>] and accommodated in a stereotaxic frame with hollow specula to  
587 facilitate direct sound delivery to the ears. Rectal temperature was maintained at ~37 °C with a  
588 homeothermic blanket system (Cibertec). We surgically exposed bregma by making an incision in  
589 the scalp at the midline and retracting the periosteum. A craniotomy of ~3 mm in diameter was  
590 performed above the left mPFC and the dura was removed.

591

## 592 **Data acquisition**

593 We recorded multiunit activity to look for evidence of predictive coding signals under acoustic  
594 oddball stimulation across fields of the mPFC of the urethane-anesthetized rat: M2, ACC, PL and IL.  
595 The rodent mPFC combines anatomo-electrophysiological elements of the primate dorsolateral PFC  
596 and ACC at a rudimentary level [56]. Experiments were conducted in an electrically shielded and  
597 sound-attenuating chamber. Recording tracts were orthogonal to the brain surface of the left mPFC:  
598 ~2.5–4.68 mm rostral to bregma, ~0.2–1.8 mm lateral to the midline and ~0.2–4.5 mm  
599 dorsoventrally. Therefore, we covered the four fields of the mPFC and various cortical layers (II–  
600 VI). We performed extracellular neurophysiological recordings with glass-coated tungsten  
601 microelectrodes (1.4–3.5 MΩ impedance at 1 kHz). We used a piezoelectric micromanipulator  
602 (Sensapex) to advance a single electrode and measure the penetration depth. We visualized  
603 electrophysiological recordings online with custom software programmed with OpenEx suite (TDT,  
604 <https://www.tdt.com/component/openex-software-suite/>) and MATLAB (MathWorks,

605 <https://www.mathworks.com/products/matlab.html>). Multiunit activity was extracted automatically  
606 by manually setting a unilateral action potential threshold above the background noise as an accurate  
607 estimation of neuronal population dynamics [82]. Analog signals were digitized with a RZ6 Multi  
608 I/O Processor, a RA16PA Medusa Preamplifier and a ZC16 headstage (TDT) at 97 kHz sampling  
609 rate and amplified 251x. Neurophysiological signals for multiunit activity were band-pass filtered  
610 between 0.5 and 4.5 kHz using a second order Butterworth filter.

611

612 The sound stimuli were generated using the RZ6 Multi I/O Processor (TDT) and custom software  
613 programmed with OpenEx Suite (TDT) and MATLAB. Sounds were presented monaurally in a  
614 close-field condition to the ear contralateral to the left mPFC, through a custom-made speaker. We  
615 calibrated the speaker using a ¼-inch condenser microphone (model 4136, Brüel & Kjær) and a  
616 dynamic signal analyzer (Photon+, Brüel & Kjær) to ensure a flat response up to  $73 \pm 1$  dB SPL  
617 between 0.5 and 44 kHz, and the second and third signal harmonics were at least 40 dB lower than  
618 the fundamental at the loudest output level.

619

## 620 **Oddball paradigm controls**

621 One limitation of the mismatch measurements obtained using the oddball paradigm is that the effects  
622 of high-order processes like genuine deviance detection or PE signaling cannot be distinguished from  
623 lower-order spectral-processing effects such as SSA [21,25]. The so-called ‘no-repetition’ controls  
624 allow to assess the relative contribution of both higher- and lower-order processes to the overall  
625 mismatch response [43]. These CTRs of the auditory oddball paradigm are tone sequences that must  
626 meet 3 criteria: (1) to feature the same tone of interest with the same presentation probability as that  
627 of the DEV; (2) to induce an equivalent state of refractoriness by presenting the same rate of  
628 stimulus per second (which excludes the DEV alone from being considered a proper CTR); and (3)

629 present no recurrent repetition of any individual stimulus, specially the tone of interest, thus ensuring  
630 that no SSA is induced during the CTR [20].

631

632 Whether the CTR-evoked response exhibited signs of expectation suppression, that could be only  
633 explained by high-order regularity encoding or predictive processing, capable of explaining away  
634 interstimulus relationships more complex than sheer repetition [21,25]. Hence, we can assess the  
635 portion of the mismatch response ( $DEV - STD$ ) that can be attributed to the effects of spectral  
636 repetition yielded during the STD train, such as SSA [15,16], by comparing the auditory-evoked  
637 responses to DEV and to CTR. When the auditory-evoked response is similar or higher during CTR  
638 than in DEV, then the mismatch response can be fully accounted for by repetition suppression, and  
639 no higher-order process of deviance detection or PE signaling can be deduced (i.e.:  $DEV \leq CTR$ ; Fig  
640 1B). In other words, this result would provide support for the adaptation hypothesis [17,18] while  
641 severely undermining the sensory-memory account [4,10]. Otherwise, a stronger response to DEV  
642 than to CTR unveils a component of the mismatch response that can only be explained by a genuine  
643 process of deviance detection or PE signaling (i.e.:  $DEV > CTR$ ; Fig 1B).

644

645 In order to dissociate the relative contribution of frequency-specific effects from processes of  
646 genuine deviance detection or predictive processing, we generated two different ‘no-repetition’  
647 CTRs for our oddball paradigms: the many-standards and cascaded sequences (Fig 1D). The many-  
648 standards sequence presents the tone of interest embedded in a random sequence of assorted tones,  
649 where each tone shares the same presentation probability as the DEV in the oddball paradigm [42].  
650 However, some authors have argued that this CTR-random is not fully comparable with the oddball  
651 paradigm, inasmuch as the disorganized succession of tones never allows to form the memory trace  
652 of a proper regularity, nor can it generate high-precision expectations, whereas the STD does.  
653 Moreover, the random succession of stimuli might generate small mismatch responses, which would

654 underestimate the contributions of deviance detection or predictive processing in the comparison of  
655 DEV against CTR [21,43].

656

657 The cascade sequence [43] tries to overcome the alleged caveats of the many-standards sequence by  
658 presenting tones in a regular fashion, e.g., in an increasing or a decreasing frequency succession.

659 Thus, the stimulus of interest conforms to a regularity—as opposed to the DEV—, but not a  
660 regularity established by repetition and susceptible to undergo SSA—contrary to the STD—, making  
661 the cascade sequence a more fitted and less conservative CTR than the many-standards sequence. As  
662 an addition advantage, the tone immediately preceding our tone of interest is the same in both  
663 oddball and cascaded sequences, since only versions following the same direction are compared (i.e.,  
664 DEV-ascending versus CTR-ascending, DEV-descending versus CTR-descending). This allows to  
665 control for another possible spectral sensitivity, which are responses to a rise or fall in frequency  
666 between two successive tones. For these reasons, the cascade sequence is regarded as a better CTR  
667 for the oddball paradigm [21,43].

668

## 669 **Recording protocol**

670 In search of evoked auditory multiunit responses from the mPFC, we presented stochastic trains of  
671 white noise bursts and sinusoidal pure tones of 75 ms duration with 5-ms rise-fall ramps, varying  
672 presentation rate and intensity to avoid possible stimulus-specific effects that could suppress evoked  
673 responses.

674

675 Once auditory activity was detected, we only used pure tones (also 75 ms duration and 5-ms rise-fall  
676 ramps) to record the experimental stimulation protocols. All stimulation sequences ran at 2 stimuli  
677 per second. First, a multiunit FRA was computed by randomly presenting pure tones of various  
678 frequency and intensity combinations that ranged from 1 to 44 kHz (in 4–6 frequency steps/octave)

679 and from 0 to 70 dBs (10 dB steps) with 1–3 repetitions per tone. In our previous studies in the  
680 auditory system [39,60,61], we selected 10 tones at frequency steps of 0.5 octaves to generate our  
681 stimulation paradigms within the receptive field determined by the FRA. However, we could not  
682 determine clear receptive fields in the multiunit FRAs of the mPFC, so we had to choose the  
683 frequencies and intensity of our test sequences based on our observations during manual search,  
684 trying to maximize the auditory-evoked response when possible. Our 400-stimuli test sequences  
685 were presented in randomized order leaving periods of >10 min of silence in between to minimize  
686 potential long-term habituation effects [83]. All test sequences presented while recording from the  
687 same multiunit were delivered at the same intensity, but we varied intensity among the different  
688 multiunits of our sample to maximize the auditory-evoked response in each case.

689

690 For each multiunit, we used all the 10 preselected tones to generate 3 no-repetition sequences (i.e.,  
691 the many-standards, cascade ascending and cascade descending), and pairs of consecutive  
692 frequencies (within those 10 tones) to generate oddball sequences. An oddball sequence consisted of  
693 a repetitive tone (STD, 90% probability), occasionally replaced by a different tone (DEV, 10%  
694 probability) in a pseudorandom manner. The first 10 stimuli of the sequence set the STD, and a  
695 minimum of 3 STD tones always preceded each DEV. Oddball sequences were either ascending or  
696 descending, depending on whether the DEV tone had a higher or lower frequency than the STD tone,  
697 respectively (Fig 1C). Additionally, in a subset of experiments we muted the STD train to measure  
698 the response of the tone of interest over a background of silence, as a DEV alone. The number of test  
699 sequences presented to each multiunit depended on the stability of the recording.

700

## 701 **Histological verification**

702 At the end of each experiment, we inflicted electrolytic lesions (10  $\mu$ A, 10 seconds) through the  
703 recording electrode. Animals were afterwards euthanized with a lethal dose of pentobarbital,

704 decapitated, and the brains immediately immersed in a mixture of 4% formaldehyde in 0.1 M PB.  
705 After fixation, tissue was cryoprotected in 30% sucrose and sectioned in the coronal plane at 40- $\mu$ m  
706 thickness on a freezing microtome. We stained slices with 0.1% cresyl violet to facilitate  
707 identification of cytoarchitectural boundaries (Fig 2A). Histological assessment of the electrolytic  
708 lesions to any of the fields of the mPFC was processed blindly to each animal history. Multiunit  
709 locations were assigned to M2, ACC, PL or IL within a rat brain atlas, accordingly with the  
710 histological verification and the stereotaxic coordinates in the three axes of recording tracts [84].

711

## 712 **Data analysis**

713 Offline data analyses were performed with MATLAB functions, the Statistics, and Machine  
714 Learning toolbox and custom-made MATLAB scripts. Computing PSTH with the 40 trial repetitions,  
715 we measured multiunit responses to each tested tone and condition (DEV, STD and CTR). In the  
716 case of the STD, we analyzed the last evoked-response before a DEV to have a comparable number  
717 of trial repetitions. PSTHs were smoothed with a 6 ms Gaussian kernel in 1 ms steps to calculate the  
718 spike-density function over time (*ksdensity* function). Thereby, we obtained the mean and standard  
719 error of the mean (SEM) of spiking rates from -100 to 700 ms around tone onset. The spike-density  
720 function of the DEV responses of the mPFC population showed a response latency of  $\sim$ 150 ms with  
721 a sustained firing spanning up to the next tone (Fig 4B). To avoid overlap of consecutive tone  
722 responses, the response analysis window preserved the interstimulus interval of 500 ms and was  
723 delayed 100 ms from stimulus onset. For this reason, we did not perform a baseline correction. We  
724 only used a baseline window of 50 ms after stimulus onset to assess significantly increased responses  
725 to sound to be included in the analyses. We performed a Monte Carlo simulation, which is a  
726 probability simulation that withdraws numerical values from several random samplings. We  
727 simulated 10000 PSTHs with a Poisson model of a constant firing rate equivalent to the baseline  
728 spontaneous spiking activity and thus, a null distribution of baseline-corrected spike count was

729 generated from the PSTHs. We computed a  $p$ -value for the original baseline-corrected spike count as  
730  $p = (g + 1)/(N + 1)$ , where  $g$  is the count of null measures  $\geq$  baseline-corrected spike count and  $N$   
731  $= 10000$  is the size of the null sample. The significance level was set at  $\alpha = 0.05$ .

732

733 To compare across different multiunits, we normalized the auditory-evoked responses to each tone of  
734 interest in 3 testing conditions as follows:

735

$$736 \quad \textit{Normalized DEV} = DEV/N$$

$$737 \quad \textit{Normalized STD} = STD/N$$

$$738 \quad \textit{Normalized CTR} = CTR/N$$

739

740 where

$$741 \quad N = \sqrt{DEV^2 + STD^2 + CTR^2}$$

742

743 is the Euclidean norm of the vector defined by the DEV, STD and CTR responses. Thereby,  
744 normalized responses are the coordinates of a 3D unit vector defined by the normalized DEV,  
745 normalized STD and normalized CTR responses that ranged between 0 and 1. This normalized  
746 vector has an identical direction to the original vector defined by the non-normalized data and equal  
747 proportions among the three response measurements.

748

749 To quantify and facilitate the interpretation of the oddball paradigm controls, we calculated the  
750 indices of neuronal mismatch (iMM, computing the overall mismatch response), repetition  
751 suppression (iRS, accounting for lower-order frequency-specific effects) and prediction error (iPE,  
752 unveiling higher-order deviance detection or PE signaling activity) with the normalized spike counts  
753 as:

754

$$755 \quad iMM = \text{Normalized DEV} - \text{Normalized STD}$$

$$756 \quad iRS = \text{Normalized CTR} - \text{Normalized STD}$$

$$757 \quad iPE = \text{Normalized DEV} - \text{Normalized CTR}$$

758

759 Index values ranged between -1 and 1, where

$$760 \quad iMM = iRS + iPE$$

761

762 Lastly, to analyze the emergence of predictive signals around stimulus presentation, we also  
763 calculated the average *iPE* in 35 time-windows of 20 ms width from -50 to 650 ms relative to  
764 stimulus onset.

765

766 For the LFP signal analysis, we filtered the raw recording between 2.2 and 50 Hz (second order  
767 Butterworth filter), and then we aligned the recorded wave to the onset of the stimulus for every trial,  
768 and computed the mean LFP for every recording site and stimulus condition (DEV, STD, CTR), as  
769 well as the ‘prediction error potential’ ( $PE\text{-LFP} = LFP_{DEV} - LFP_{CTR}$ ). Then, grand-averages were  
770 computed for all conditions, for each auditory station separately. The *p*-value of the grand-averaged  
771 PE-LFP was determined for every time point with a two-tailed *t* test (Bonferroni-corrected for 428  
772 comparisons, with family-wise error rate  $FWER < 0.05$ ), and we computed the time intervals, where  
773 PE-LFP was significantly different from zero.

774

775 Our data set was not normally distributed so we used distribution-free (non-parametric) tests. These  
776 included the Wilcoxon signed-rank test, Wilcoxon rank-sum test and Friedman test (for spike counts,  
777 normalized responses, indices and response latencies), as well as the Kruskal-Wallis test with Dunn-  
778 Sidak correction for multiple index comparisons between each field from the mPFC and AC. Only



779 the difference wave for the LFPs (PE-LFP) was tested using a *t* test, since each LFP trace is itself an  
780 average of 40 waves, and thus approximately normal (according to the Central Limit Theorem). For  
781 multiple comparison tests, *p*-values were corrected for false discovery rate (FDR = 0.1) using the  
782 Benjamini-Hockberg method [85].

783

784 To analyze the time course of suppression over the auditory-evoked response, we measured the  
785 DEV, STD and CTR responses of each tone of interest as average spike counts (each unit normalized  
786 to the Euclidean norm, as previously explained) for every trial number within the sequence, for each  
787 field separately [38]. Given that the Euclidean Norm vector was calculated for each unit based on the  
788 mean DEV, CTR and STD responses, some individual trials have values above 1. We included all  
789 the standard tones, not just the last standard before a deviant event as previously. Thereby, we  
790 ordered average normalized spike counts at their absolute trial position within the sequence and  
791 generated the time course of responses from the beginning of the sequence. Then, we fitted these  
792 time series to various models, namely, linear, exponential, double exponential, inverse polynomial,  
793 and power-law with two or three coefficients. We used the *fit* function in MATLAB that computes  
794 the confidence intervals of the fitted parameters and the adjusted  $R^2$ , the coefficient of determination  
795 of the function fit.

796

797 For the additional data set including the DEV alone, tests of sound-driven enhanced responses, spike-  
798 density functions, spike counts and normalized responses followed the same previously described  
799 analyses. This time, the three compared conditions were the DEV alone, DEV and STD. Since this  
800 was an additional experiment to compare the influence of different stimulation contexts on DEV  
801 responses, the whole sample was merged along the mPFC.

802

## 803 **Acknowledgments**

804 We thank Drs Ryszard Auksztulewicz, Edward L. Bartlett, Conrado A. Bosman, Yves Boubenec,  
805 Nell B. Cant, Lucia Melloni and Kirill V. Nourski for their constructive criticisms and fruitful  
806 discussions on previous versions of the manuscript. We also thank Drs Gloria G. Parras and Javier  
807 Nieto-Diego for their assistance with neurophysiological recordings and data analyses, as well as Mr  
808 Antonio Rivas Cornejo for the histological processing.

809

## 810 **Author Contributions**

811 Conceptualization: LCR, GVC, DPG and MSM. Investigation: LCR. Formal analysis: LCR, GVC  
812 and DPG. Software: LCR and DPG. Visualization: LCR and GVC. Writing – original draft: LCR and  
813 MSM. Writing – review & editing: LCR, GVC, DPG and MSM. Supervision: MSM. Funding  
814 Acquisition: MSM.

815

816 **Data Availability Statement:** All relevant data are within the paper and its Supporting  
817 Information files. The scripts and functions written in MATLAB to generate the results and analysis  
818 during the current study are available from the corresponding author upon reasonable request.

819

820 **Competing Interests:** We have read the journal's policy and the authors of this manuscript have  
821 the following competing interests: Manuel S. Malmierca is an Academic Editor for PLOS Biology.  
822 The other authors have declared that no competing interests exists.

823

## 824 **Funding**

825 Financial support for this study was provided by the European Union Framework Programme for  
826 Research and Innovation Horizon 2020 (Marie Skłodowska-Curie ITN-LISTEN, Grant No. 722098,

827 <http://www.listenscience.eu/>) and by the Spanish Ministry of Science and Innovation (MICINN,  
828 Grant No. SAF2016-75803-P) to MSM. GVC held a fellowship from the Spanish MICINN (BES-  
829 2017-080030). The funders had no role in the design, data collection and analysis, decision to  
830 publish, or preparation of the manuscript.

831

## 832 **References**

- 833 1. Näätänen R, Gaillard AWK, Mäntysalo S. Early selective-attention effect on evoked potential  
834 reinterpreted. *Acta Psychol (Amst)*. 1978;42: 313–329. doi:10.1016/0001-6918(78)90006-9
- 835 2. Näätänen R, Michie PT. Early selective-attention effects on the evoked potential: A critical  
836 review and reinterpretation. *Biol Psychol*. 1979;8: 81–136. doi:10.1016/0301-0511(79)90053-  
837 X
- 838 3. Kujala T, Tervaniemi M, Schröger E. The mismatch negativity in cognitive and clinical  
839 neuroscience: Theoretical and methodological considerations. *Biol Psychol*. 2007;74: 1–19.  
840 doi:10.1016/j.biopsycho.2006.06.001
- 841 4. Näätänen R, Paavilainen P, Rinne T, Alho K. The mismatch negativity (MMN) in basic  
842 research of central auditory processing: A review. *Clin Neurophysiol*. 2007;118: 2544–2590.  
843 doi:10.1016/j.clinph.2007.04.026
- 844 5. Schall U. Is it time to move mismatch negativity into the clinic? *Biol Psychol*. 2016;116: 41–  
845 46. doi:10.1016/j.biopsycho.2015.09.001
- 846 6. Fitzgerald K, Todd J. Making Sense of Mismatch Negativity. *Front Psychiatry*. 2020;11: 468.  
847 doi:10.3389/fpsy.2020.00468
- 848 7. Opitz B, Rinne T, Mecklinger A, Von Cramon DY, Schröger E. Differential contribution of

- 849 frontal and temporal cortices to auditory change detection: FMRI and ERP results.  
850 *Neuroimage*. 2002;15: 167–174. doi:10.1006/nimg.2001.0970
- 851 8. Paavilainen P, Mikkonen M, Kilpeläinen M, Lehtinen R, Saarela M, Tapola L. Evidence for  
852 the different additivity of the temporal and frontal generators of mismatch negativity: A  
853 human auditory event-related potential study. *Neurosci Lett*. 2003;349: 79–82.  
854 doi:10.1016/S0304-3940(03)00787-0
- 855 9. Näätänen R, Teder W, Alho K, Lavikainen J. Auditory attention and selective input  
856 modulation: A topographical ERP study. *Neuroreport*. 1992;3: 493–496.  
857 doi:10.1097/00001756-199206000-00009
- 858 10. Näätänen R. The role of attention in auditory information processing as revealed by event-  
859 related potentials and other brain measures of cognitive function. *Behav Brain Sci*. 1990;13:  
860 201–233. doi:10.1017/S0140525X00078407
- 861 11. Näätänen R, Alho K. Mismatch negativity-a unique measure of sensory processing in  
862 audition. *Int J Neurosci*. 1995;80: 317–337. doi:10.3109/00207459508986107
- 863 12. Giard M-H, Perrin F, Pernier J, Bouchet P. Brain Generators Implicated in the Processing of  
864 Auditory Stimulus Deviance: A Topographic Event-Related Potential Study.  
865 *Psychophysiology*. 1990;27: 627–640. doi:10.1111/j.1469-8986.1990.tb03184.x
- 866 13. Doeller CF, Opitz B, Mecklinger A, Krick C, Reith W, Schröger E. Prefrontal cortex  
867 involvement in preattentive auditory deviance detection: Neuroimaging and  
868 electrophysiological evidence. *Neuroimage*. 2003;20: 1270–1282. doi:10.1016/S1053-  
869 8119(03)00389-6
- 870 14. Sikkens T, Bosman CA, Olcese U. The Role of Top-Down Modulation in Shaping Sensory

- 871 Processing Across Brain States: Implications for Consciousness. *Front Syst Neurosci.*  
872 2019;13: 31. doi:10.3389/fnsys.2019.00031
- 873 15. Ulanovsky N, Las L, Nelken I. Processing of low-probability sounds by cortical neurons. *Nat*  
874 *Neurosci.* 2003;6: 391–398. doi:10.1038/nn1032
- 875 16. Jääskeläinen IP, Ahveninen J, Bonmassar G, Dale AM, Ilmoniemi RJ, Levänen S, et al.  
876 Human posterior auditory cortex gates novel sounds to consciousness. *Proc Natl Acad Sci.*  
877 2004;101: 6809–6814. doi:10.1073/pnas.0303760101
- 878 17. May PJC, Tiitinen H. Mismatch negativity (MMN), the deviance-elicited auditory deflection,  
879 explained. *Psychophysiology.* 2010;47: 66–122. doi:10.1111/j.1469-8986.2009.00856.x
- 880 18. Fishman YI. The mechanisms and meaning of the mismatch negativity. *Brain Topogr.*  
881 2014;27: 500–526. doi:10.1007/s10548-013-0337-3
- 882 19. Alho K. Cerebral generators of mismatch negativity (MMN) and its magnetic counterpart  
883 (MMNm) elicited by sound changes. *Ear Hear.* 1995;16: 38–51. doi:10.1097/00003446-  
884 199502000-00004
- 885 20. Carbajal G V, Malmierca MS. Novelty Processing in the Auditory System: Detection,  
886 Adaptation or Expectation? 2nd ed. In: Fritzsche B, editor. *The Senses: A Comprehensive*  
887 *Reference.* 2nd ed. Elsevier; 2020. doi:10.1016/B978-0-12-809324-5.24154-0
- 888 21. Carbajal GV, Malmierca MS. The Neuronal Basis of Predictive Coding Along the Auditory  
889 Pathway: From the Subcortical Roots to Cortical Deviance Detection. *Trends Hear.* 2018;22:  
890 233121651878482. doi:10.1177/2331216518784822
- 891 22. Garrido MI, Kilner JM, Kiebel SJ, Stephan KE, Baldeweg T, Friston KJ. Repetition

- 892 suppression and plasticity in the human brain. *Neuroimage*. 2009;48: 269–279.  
893 doi:10.1016/j.neuroimage.2009.06.034
- 894 23. Garrido MI, Kilner JM, Stephan KE, Friston KJ. The mismatch negativity: A review of  
895 underlying mechanisms. *Clin Neurophysiol*. 2009;120: 453–463.  
896 doi:10.1016/j.clinph.2008.11.029
- 897 24. Aukstulewicz R, Friston K. Repetition suppression and its contextual determinants in  
898 predictive coding. *Cortex*. 2016;80: 125–140. doi:10.1016/j.cortex.2015.11.024
- 899 25. Todorovic A, de Lange FP. Repetition suppression and expectation suppression are  
900 dissociable in time in early auditory evoked fields. *J Neurosci*. 2012;32: 13389–13395.  
901 doi:10.1523/JNEUROSCI.2227-12.2012
- 902 26. Baldeweg T. Repetition effects to sounds: evidence for predictive coding in the auditory  
903 system. *Trends Cogn Sci*. 2006;10: 93–4. doi:10.1016/j.tics.2006.01.010
- 904 27. Friston K. A theory of cortical responses. *Philos Trans R Soc B Biol Sci*. 2005;360: 815–836.  
905 doi:10.1098/rstb.2005.1622
- 906 28. Friston K. The free-energy principle: a rough guide to the brain? *Trends Cogn Sci*. 2009;13:  
907 293–301. doi:10.1016/j.tics.2009.04.005
- 908 29. Garrido MI, Friston KJ, Kiebel SJ, Stephan KE, Baldeweg T, Kilner JM. The functional  
909 anatomy of the MMN: a DCM study of the roving paradigm. *Neuroimage*. 2008;42: 936–44.  
910 doi:10.1016/j.neuroimage.2008.05.018
- 911 30. Garrido MI, Kilner JM, Kiebel SJ, Friston KJ. Dynamic causal modeling of the response to  
912 frequency Deviants. *J Neurophysiol*. 2009;101: 2620–2631. doi:10.1152/jn.90291.2008

- 913 31. Deouell LY. The frontal generator of the mismatch negativity revisited. *J Psychophysiol.*  
914 2007;21: 188–203. doi:10.1027/0269-8803.21.34.188
- 915 32. Rinne T, Alho K, Ilmoniemi RJ, Virtanen J, Näätänen R. Separate Time Behaviors of the  
916 Temporal and Frontal Mismatch Negativity Sources. *Neuroimage.* 2000;12: 14–19.  
917 doi:10.1006/nimg.2000.0591
- 918 33. Tse CY, Penney TB. On the functional role of temporal and frontal cortex activation in  
919 passive detection of auditory deviance. *Neuroimage.* 2008;41: 1462–1470.  
920 doi:10.1016/j.neuroimage.2008.03.043
- 921 34. Dürschmid S, Edwards E, Reichert C, Dewar C, Hinrichs H, Heinze H-J, et al. Hierarchy of  
922 prediction errors for auditory events in human temporal and frontal cortex. *Proc Natl Acad*  
923 *Sci.* 2016;113: 6755–6760. doi:10.1073/pnas.1525030113
- 924 35. Edwards E, Soltani M, Deouell LY, Berger MS, Knight RT. High gamma activity in response  
925 to deviant auditory stimuli recorded directly from human cortex. *J Neurophysiol.* 2005;94:  
926 4269–4280. doi:10.1152/jn.00324.2005
- 927 36. Rosburg T, Trautner P, Dietl T, Korzyukov OA, Boutros NN, Schaller C, et al. Subdural  
928 recordings of the mismatch negativity (MMN) in patients with focal epilepsy. *Brain.*  
929 2005;128: 819–828. doi:10.1093/brain/awh442
- 930 37. Nourski K V, Steinschneider M, Rhone AE, Kawasaki H, Howard MA, Banks MI. Processing  
931 of auditory novelty across the cortical hierarchy: An intracranial electrophysiology study.  
932 *Neuroimage.* 2018;183: 412–424. doi:10.1016/j.neuroimage.2018.08.027
- 933 38. Nieto-Diego J, Malmierca MS. Topographic Distribution of Stimulus-Specific Adaptation  
934 across Auditory Cortical Fields in the Anesthetized Rat. Zatorre R, editor. *PLoS Biol.*

- 935 2016;14: e1002397. doi:10.1371/journal.pbio.1002397
- 936 39. Parras GG, Nieto-Diego J, Carbajal G V., Valdés-Baizabal C, Escera C, Malmierca MS.  
937 Neurons along the auditory pathway exhibit a hierarchical organization of prediction error.  
938 Nat Commun. 2017;8: 2148. doi:10.1038/s41467-017-02038-6
- 939 40. Harms L, Fulham WR, Todd J, Budd TW, Hunter M, Meehan C, et al. Mismatch negativity  
940 (MMN) in freely-moving rats with several experimental controls. PLoS One. 2014;9:  
941 e110892. doi:10.1371/journal.pone.0110892
- 942 41. Harms L, Michie PT, Näätänen R. Criteria for determining whether mismatch responses exist  
943 in animal models: Focus on rodents. Biol Psychol. 2016;116: 28–35.  
944 doi:10.1016/j.biopsycho.2015.07.006
- 945 42. Jacobsen T, Horenkamp T, Schröger E. Preattentive memory-based comparison of sound  
946 intensity. Audiol Neuro-Otology. 2003;8: 338–346. doi:10.1159/000073518
- 947 43. Ruhnau P, Herrmann B, Schröger E. Finding the right control: the mismatch negativity under  
948 investigation. Clin Neurophysiol. 2012;123: 507–412. doi:10.1016/j.clinph.2011.07.035
- 949 44. Imada A, Morris A, Wiest MC. Deviance detection by a P3-like response in rat posterior  
950 parietal cortex. Front Integr Neurosci. 2013;6: 127. doi:10.3389/fnint.2012.00127
- 951 45. Jodo E, Inaba H, Narihara I, Sotoyama H, Kitayama E, Yabe H, et al. Neonatal exposure to an  
952 inflammatory cytokine, epidermal growth factor, results in the deficits of mismatch negativity  
953 in rats. Sci Rep. 2019;9: 7503. doi:10.1038/s41598-019-43923-y
- 954 46. Wiens S, Szychowska M, Eklund R, van Berlekom E. Cascade and no-repetition rules are  
955 comparable controls for the auditory frequency mismatch negativity in oddball tasks.



- 956 Psychophysiology. 2019;56: e13280. doi:10.1111/psyp.13280
- 957 47. Bastos AM, Usrey WM, Adams RA, Mangun GR, Fries P, Friston KJ. Canonical  
958 Microcircuits for Predictive Coding. *Neuron*. 2012;76: 695–711.  
959 doi:10.1016/j.neuron.2012.10.038
- 960 48. Heilbron M, Chait M. Great Expectations: Is there Evidence for Predictive Coding in Auditory  
961 Cortex? *Neuroscience*. 2018. pp. 54–73. doi:10.1016/j.neuroscience.2017.07.061
- 962 49. Buzsáki G, Anastassiou CA, Koch C. The origin of extracellular fields and currents-EEG,  
963 ECoG, LFP and spikes. *Nat Rev Neurosci*. 2012;13: 407–420. doi:10.1038/nrn3241
- 964 50. Horváth J, Winkler I. How the human auditory system treats repetition amongst change.  
965 *Neurosci Lett*. 2004;368: 157–161. doi:10.1016/j.neulet.2004.07.004
- 966 51. Mittag M, Takegata R, Winkler I. Transitional Probabilities Are Prioritized over  
967 Stimulus/Pattern Probabilities in Auditory Deviance Detection: Memory Basis for Predictive  
968 Sound Processing. *J Neurosci*. 2016;36: 9572–9579. doi:10.1523/JNEUROSCI.1041-16.2016
- 969 52. Srivastava HK, Bandyopadhyay S. Parallel lemniscal and non-lemniscal sources control  
970 auditory responses in the orbitofrontal cortex (OFC). *eneuro*. 2020; ENEURO.0121-20.2020.  
971 doi:10.1523/eneuro.0121-20.2020
- 972 53. Camalier CR, Scarim K, Mishkin M, Averbeck BB. A Comparison of Auditory Oddball  
973 Responses in Dorsolateral Prefrontal Cortex, Basolateral Amygdala, and Auditory Cortex of  
974 Macaque. *J Cogn Neurosci*. 2019;31: 1054–1064. doi:10.1162/jocn\_a\_01387
- 975 54. Takaura K, Fujii N. Facilitative effect of repetitive presentation of one stimulus on cortical  
976 responses to other stimuli in macaque monkeys - a possible neural mechanism for mismatch

- 977 negativity. Foxe J, editor. *Eur J Neurosci*. 2016;43: 516–528. doi:10.1111/ejn.13136
- 978 55. Phillips HN, Blenkmann A, Hughes LE, Kochen S, Bekinschtein TA, Cam-Can, et al.  
979 Convergent evidence for hierarchical prediction networks from human electrocorticography  
980 and magnetoencephalography. *Cortex*. 2016;82: 192–205. doi:10.1016/j.cortex.2016.05.001
- 981 56. Seamans JK, Lapish CC, Durstewitz D. Comparing the prefrontal cortex of rats and primates:  
982 Insights from electrophysiology. *Neurotox Res*. 2008;14: 249–262. doi:10.1007/BF03033814
- 983 57. Parr T, Rikhye RV, Halassa MM, Friston KJ. Prefrontal Computation as Active Inference.  
984 *Cereb Cortex*. 2020;30: 682–695. doi:10.1093/cercor/bhz118
- 985 58. Hoover WB, Vertes RP. Anatomical analysis of afferent projections to the medial prefrontal  
986 cortex in the rat. *Brain Struct Funct*. 2007;212: 149–179. doi:10.1007/s00429-007-0150-4
- 987 59. Keller GB, Mrsic-Flogel TD. Predictive processing: a canonical cortical computation. *Neuron*.  
988 2018;100: 424–435. doi:10.1016/j.neuron.2018.10.003
- 989 60. Parras GG, Valdés-Baizabal C, Harms L, Michie PT, Malmierca MS. The effect of NMDA-R  
990 antagonist, MK-801, on neuronal mismatch along the rat auditory thalamocortical pathway.  
991 *Sci Rep*. 2020;10: 12391. doi:10.1038/s41598-020-68837-y
- 992 61. Valdés-Baizabal C, Carbajal G V., Pérez-González D, Malmierca MS. Dopamine modulates  
993 subcortical responses to surprising sounds. *PLoS Biol*. 2020;18.  
994 doi:10.1371/journal.pbio.3000744
- 995 62. Dürschmid S, Zaehle T, Hinrichs H, Heinze HJ, Voges J, Garrido MI, et al. Sensory Deviancy  
996 Detection Measured Directly Within the Human Nucleus Accumbens. *Cereb Cortex*. 2016;26:  
997 1168–1175. doi:10.1093/cercor/bhu304

- 998 63. Barascud N, Pearce MT, Griffiths TD, Friston KJ, Chait M. Brain responses in humans reveal  
999 ideal observer-like sensitivity to complex acoustic patterns. *Proc Natl Acad Sci.* 2016;113:  
1000 E616–E625. doi:10.1073/pnas.1508523113
- 1001 64. Kiehl KA, Stevens MC, Laurens KR, Pearlson G, Calhoun VD, Liddle PF. An adaptive  
1002 reflexive processing model of neurocognitive function: Supporting evidence from a large scale  
1003 (n = 100) fMRI study of an auditory oddball task. *Neuroimage.* 2005;25: 899–915.  
1004 doi:10.1016/j.neuroimage.2004.12.035
- 1005 65. Czisch M, Wehrle R, Stiegler A, Peters H, Andrade K, Holsboer F, et al. Acoustic oddball  
1006 during NREM sleep: A combined EEG/fMRI study. Grothe B, editor. *PLoS One.* 2009;4:  
1007 e6749. doi:10.1371/journal.pone.0006749
- 1008 66. Rummell BP, Klee JL, Sigurdsson T. Attenuation of responses to self-generated sounds in  
1009 auditory cortical neurons. *J Neurosci.* 2016;36: 12010–12026. doi:10.1523/jneurosci.1564-  
1010 16.2016
- 1011 67. Pérez-González D, Parras GG, Morado-Díaz CJ, Aedo-Sánchez C, Carbajal G V., Malmierca  
1012 MS. Deviance detection in physiologically identified cell types in the rat auditory cortex. *Hear*  
1013 *Res.* 2020 [cited 24 Sep 2020]. doi:10.1016/j.heares.2020.107997
- 1014 68. Spratling MW. Reconciling predictive coding and biased competition models of cortical  
1015 function. *Front Comput Neurosci.* 2008;2: 4. doi:10.3389/neuro.10.004.2008
- 1016 69. Spratling MW. Predictive coding as a model of biased competition in visual attention. *Vision*  
1017 *Res.* 2008;48: 1391–408. doi:10.1016/j.visres.2008.03.009
- 1018 70. Shipp S. Neural elements for predictive coding. *Front Psychol.* 2016;7: 1792.  
1019 doi:10.3389/fpsyg.2016.01792

- 1020 71. Spratling MW. A review of predictive coding algorithms. *Brain Cogn.* 2017;112: 92–97.  
1021 doi:10.1016/j.bandc.2015.11.003
- 1022 72. Szymanski FD, García-Lázaro JA, Schnupp JWH. Current source density profiles of stimulus-  
1023 specific adaptation in rat auditory cortex. *J Neurophysiol.* 2009;102: 1483–1490.  
1024 doi:10.1152/jn.00240.2009
- 1025 73. Nashida T, Yabe H, Sato Y, Hiruma T, Sutoh T, Shinozaki N, et al. Automatic auditory  
1026 information processing in sleep. *Sleep.* 2000;23: 821–828.
- 1027 74. Strauss M, Sitt JD, King J-R, Elbaz M, Azizi L, Buiatti M, et al. Disruption of hierarchical  
1028 predictive coding during sleep. *Proc Natl Acad Sci U S A.* 2015;112: E1353-62.  
1029 doi:10.1073/pnas.1501026112
- 1030 75. Koelsch S, Heinke W, Sammler D, Olthoff D. Auditory processing during deep propofol  
1031 sedation and recovery from unconsciousness. *Clin Neurophysiol.* 2006;117: 1746–1759.  
1032 doi:10.1016/j.clinph.2006.05.009
- 1033 76. Quaedflieg CW, Münte S, Kalso E, Sambeth A. Effects of remifentanil on processing of  
1034 auditory stimuli: A combined MEG/EEG study. *J Psychopharmacol.* 2014;28: 39–48.  
1035 doi:10.1177/0269881113512036
- 1036 77. Rodríguez RA, Bussière M, Froeschl M, Nathan HJ. Auditory-evoked potentials during coma:  
1037 Do they improve our prediction of awakening in comatose patients? *J Crit Care.* 2014;29: 93–  
1038 100. doi:10.1016/j.jcrc.2013.08.020
- 1039 78. Morlet D, Fischer C. MMN and novelty P3 in coma and other altered states of consciousness:  
1040 A review. *Brain Topogr.* 2014;27: 467–479. doi:10.1007/s10548-013-0335-5

- 1041 79. Ayala YA, Pérez-González D, Duque D, Palmer AR, Malmierca MS. Extracellular Recording  
1042 of Neuronal Activity Combined with Microiontophoretic Application of Neuroactive  
1043 Substances in Awake Mice. *J Vis Exp*. 2016;e53914. doi:10.3791/53914
- 1044 80. Duque D, Malmierca MS. Stimulus-specific adaptation in the inferior colliculus of the mouse:  
1045 anesthesia and spontaneous activity effects. *Brain Struct Funct*. 2015;220: 3385–3398.  
1046 doi:10.1007/s00429-014-0862-1
- 1047 81. Hara K, Harris RA. The Anesthetic Mechanism of Urethane: The Effects on Neurotransmitter-  
1048 Gated Ion Channels. *Anesth Analg*. 2002;94: 313–318. doi:10.1213/0000539-200202000-  
1049 00015
- 1050 82. Trautmann EM, Stavisky SD, Lahiri S, Ames KC, Kaufman MT, O’Shea DJ, et al. Accurate  
1051 Estimation of Neural Population Dynamics without Spike Sorting. *Neuron*. 2019;103: 292-  
1052 308.e4. doi:10.1016/j.neuron.2019.05.003
- 1053 83. Lu K, Liu W, Zan P, David S V, Fritz JB, Shamma SA. Implicit memory for complex sounds  
1054 in higher auditory cortex of the ferret. *J Neurosci*. 2018. doi:10.1523/JNEUROSCI.2118-  
1055 18.2018
- 1056 84. Paxinos G, Watson C. *The rat brain in stereotaxic coordinates*. Elsevier; 2007.
- 1057 85. Benjamini Y, Hochberg Y. Controlling the False Discovery Rate: A Practical and Powerful  
1058 Approach to Multiple Testing. *J R Stat Soc Ser B*. 1995;57: 289–300. doi:10.1111/j.2517-  
1059 6161.1995.tb02031.x

1060

1061

1062 **Figures Legends**

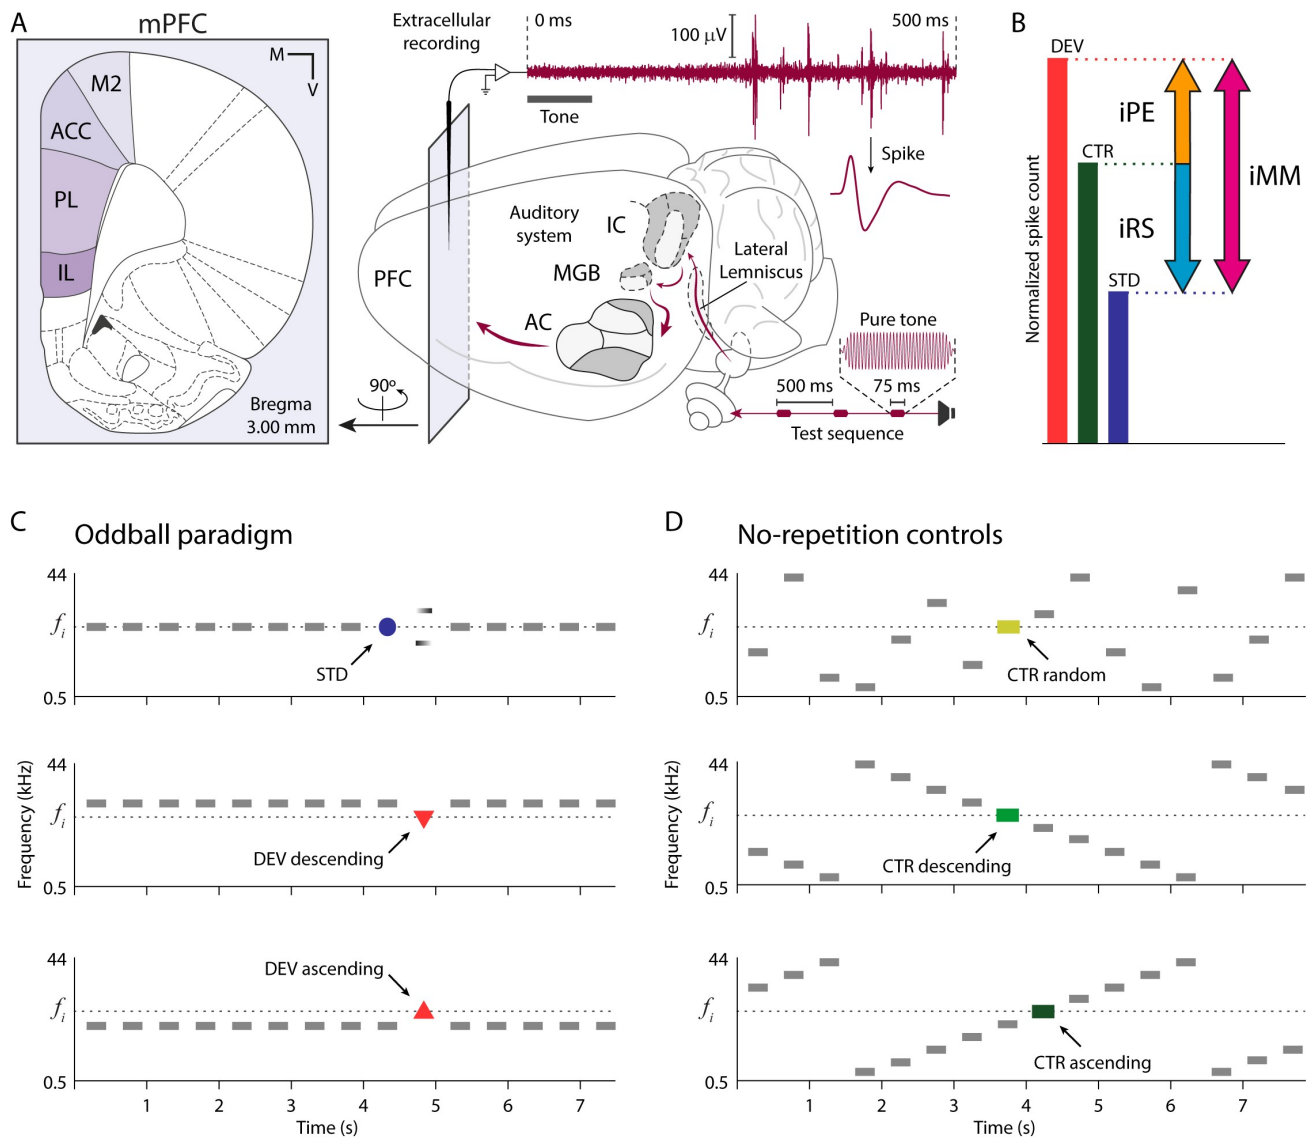

1063

1064 **Fig 1. Experimental design. (A)** Schematic representation of an experimental setup for extracellular  
 1065 recording of auditory-evoked responses in a rat brain. In the left sublet, a schematic coronal section  
 1066 where mPFC fields are highlighted in violet tones. At the right, maroon elements represent the flow  
 1067 of auditory information during the experimental session, from the speaker through the rat brain and  
 1068 into a raw recording trace. **(B)** Decomposition of mismatch responses using the CTR and  
 1069 quantification in 3 indices. **(C)** 3 possible experimental conditions within an oddball paradigm for a  
 1070 given tone of interest  $f_i$  (colored). **(D)** 3 possible control conditions for a given tone of interest  
 1071 (colored). At the top, the many-standards sequence; at the middle and bottom, 2 versions of the

1072 cascade sequence. Anterior cingulate cortex (ACC), auditory cortex (AC), control condition (CTR),  
1073 deviant condition (DEV), index of neuronal mismatch (iMM), index of prediction error (iPE), index  
1074 of repetition suppression (iRS), inferior colliculus (IC), infralimbic cortex (IL), medial (M), medial  
1075 geniculate body (MGB), medial prefrontal cortex (mPFC), prefrontal cortex (PFC), prelimbic cortex  
1076 (PL), secondary motor cortex (M2), standard condition (STD), standard error of the mean (SEM),  
1077 ventral (V).

1078

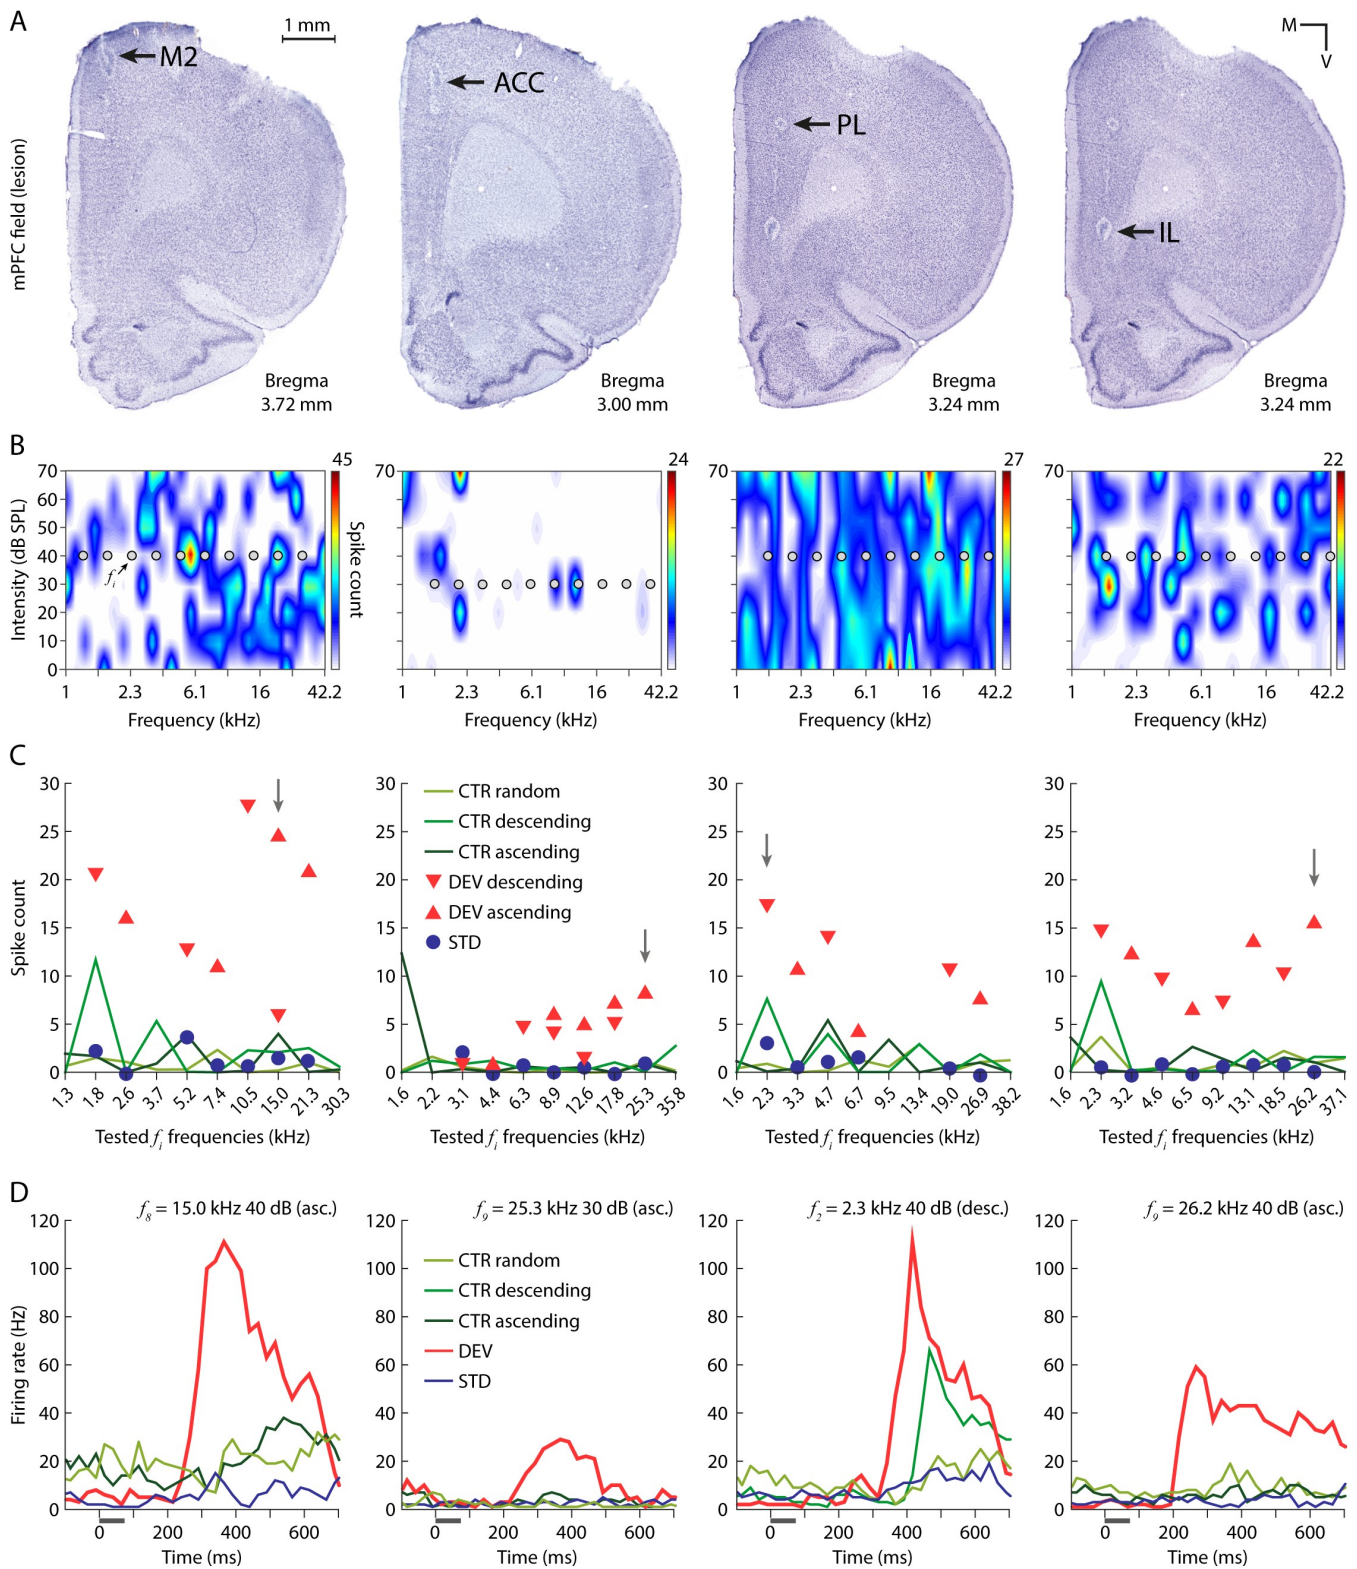

1079

1080 **Fig 2. Multiunit recording examples from each mPFC field. (A)** Coronal mPFC sections where  
 1081 electrolytic lesions (black arrows) mark the recording sites of the multiunits whose auditory-evoked  
 1082 responses are plotted in the sublets below. Hence, column-wise sublets correspond to the same



1083 multiunit. **(B)** FRA of one multiunit from each mPFC station. Within each FRA, 10 grey dots mark  
1084 the set of 10 pure  $f_i$  tones selected to generate the testing sequences (Fig 1C and D), whose evoked  
1085 response is plotted in the subplot below. **(C)** Multiunit spike counts for every experimental condition  
1086 of the 10  $f_i$  tested. A vertical grey arrow points at the  $f_i$  tone whose peristimulus histogram is plotted  
1087 in the subplot below. **(D)** Peristimulus histogram showing the firing rate elicited by each experimental  
1088 condition tested for one  $f_i$  tone, illustrated as a grey horizontal line. The underlying data for this  
1089 Figure can be found in S1 Data. Anterior cingulate cortex (ACC), control condition (CTR), deviant  
1090 condition (DEV), infralimbic cortex (IL), secondary motor cortex (M2), prelimbic cortex (PL),  
1091 standard condition (STD).

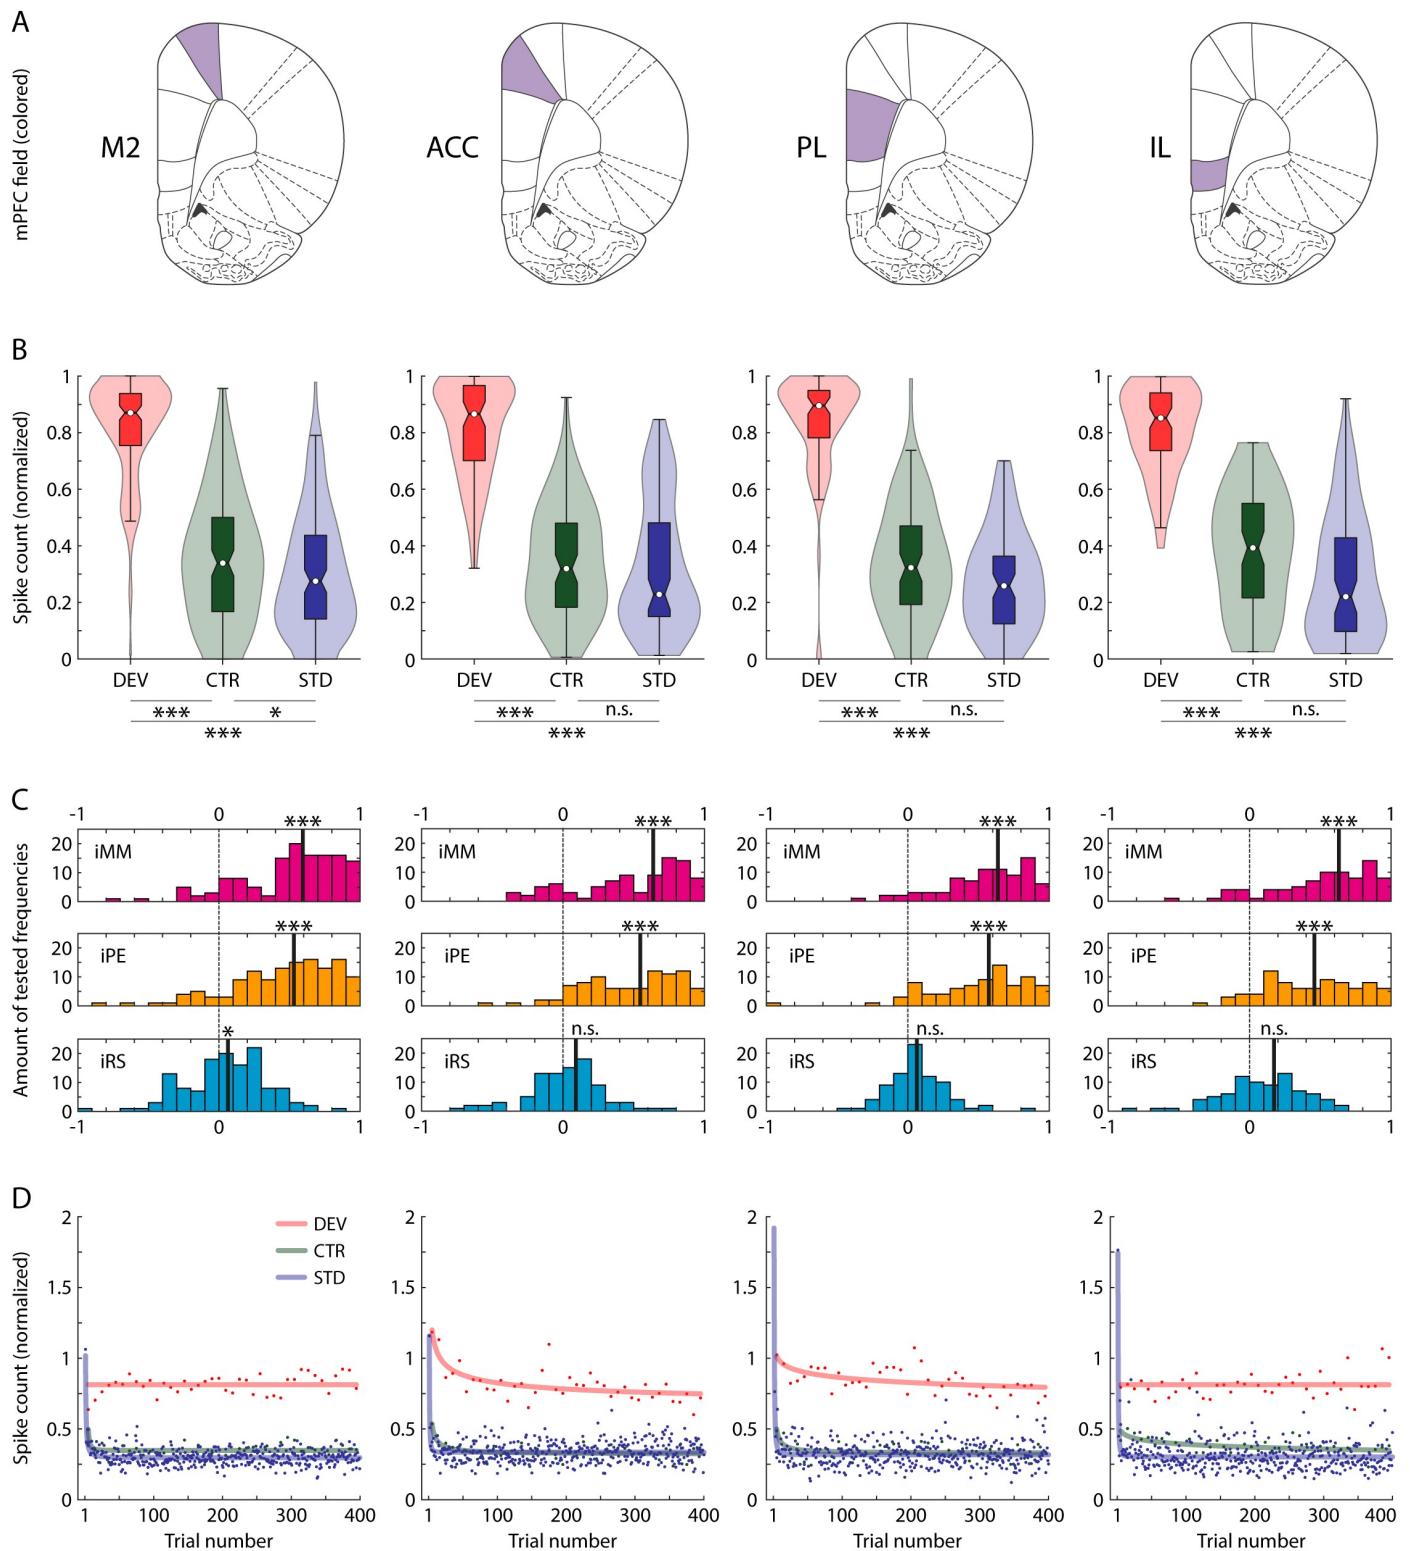

1092

1093 **Fig 3. Spiking activity analysis. (A)** Schematic representation of coronal planes highlighting each

1094 mPFC field for column-wise reference. **(B)** Violin plots representing the distribution of normalized

1095 spike counts for each experimental condition. The boxplots inside each distribution indicates the

1096 median as a white dot, the interquartile range as the box, and the confidence interval for the median

1097 as the notches. Asterisks denote statistically significant difference between conditions (*n.s. non-*  
1098 *significant*,  $*p < 0.05$ ,  $**p < 0.01$ ,  $***p < 0.001$ ). **(C)** Distribution of indices in each mPFC field. **(D)**  
1099 Average spike count per trial number for each condition along the test sequence. Asterisks denote  
1100 statistical significance against zero (*n.s. non-significant*,  $*p < 0.05$ ,  $**p < 0.01$ ,  $***p < 0.001$ ). The  
1101 underlying data for this Figure can be found in S2 Data. Anterior cingulate cortex (ACC), auditory  
1102 cortex (AC), control condition (CTR), deviant condition (DEV), index of neuronal mismatch (iMM),  
1103 index of prediction error (iPE), index of repetition suppression (iRS), inferior colliculus (IC),  
1104 infralimbic cortex (IL), medial geniculate body (MGB), prelimbic cortex (PL), secondary motor  
1105 cortex (M2), standard condition (STD).

1106

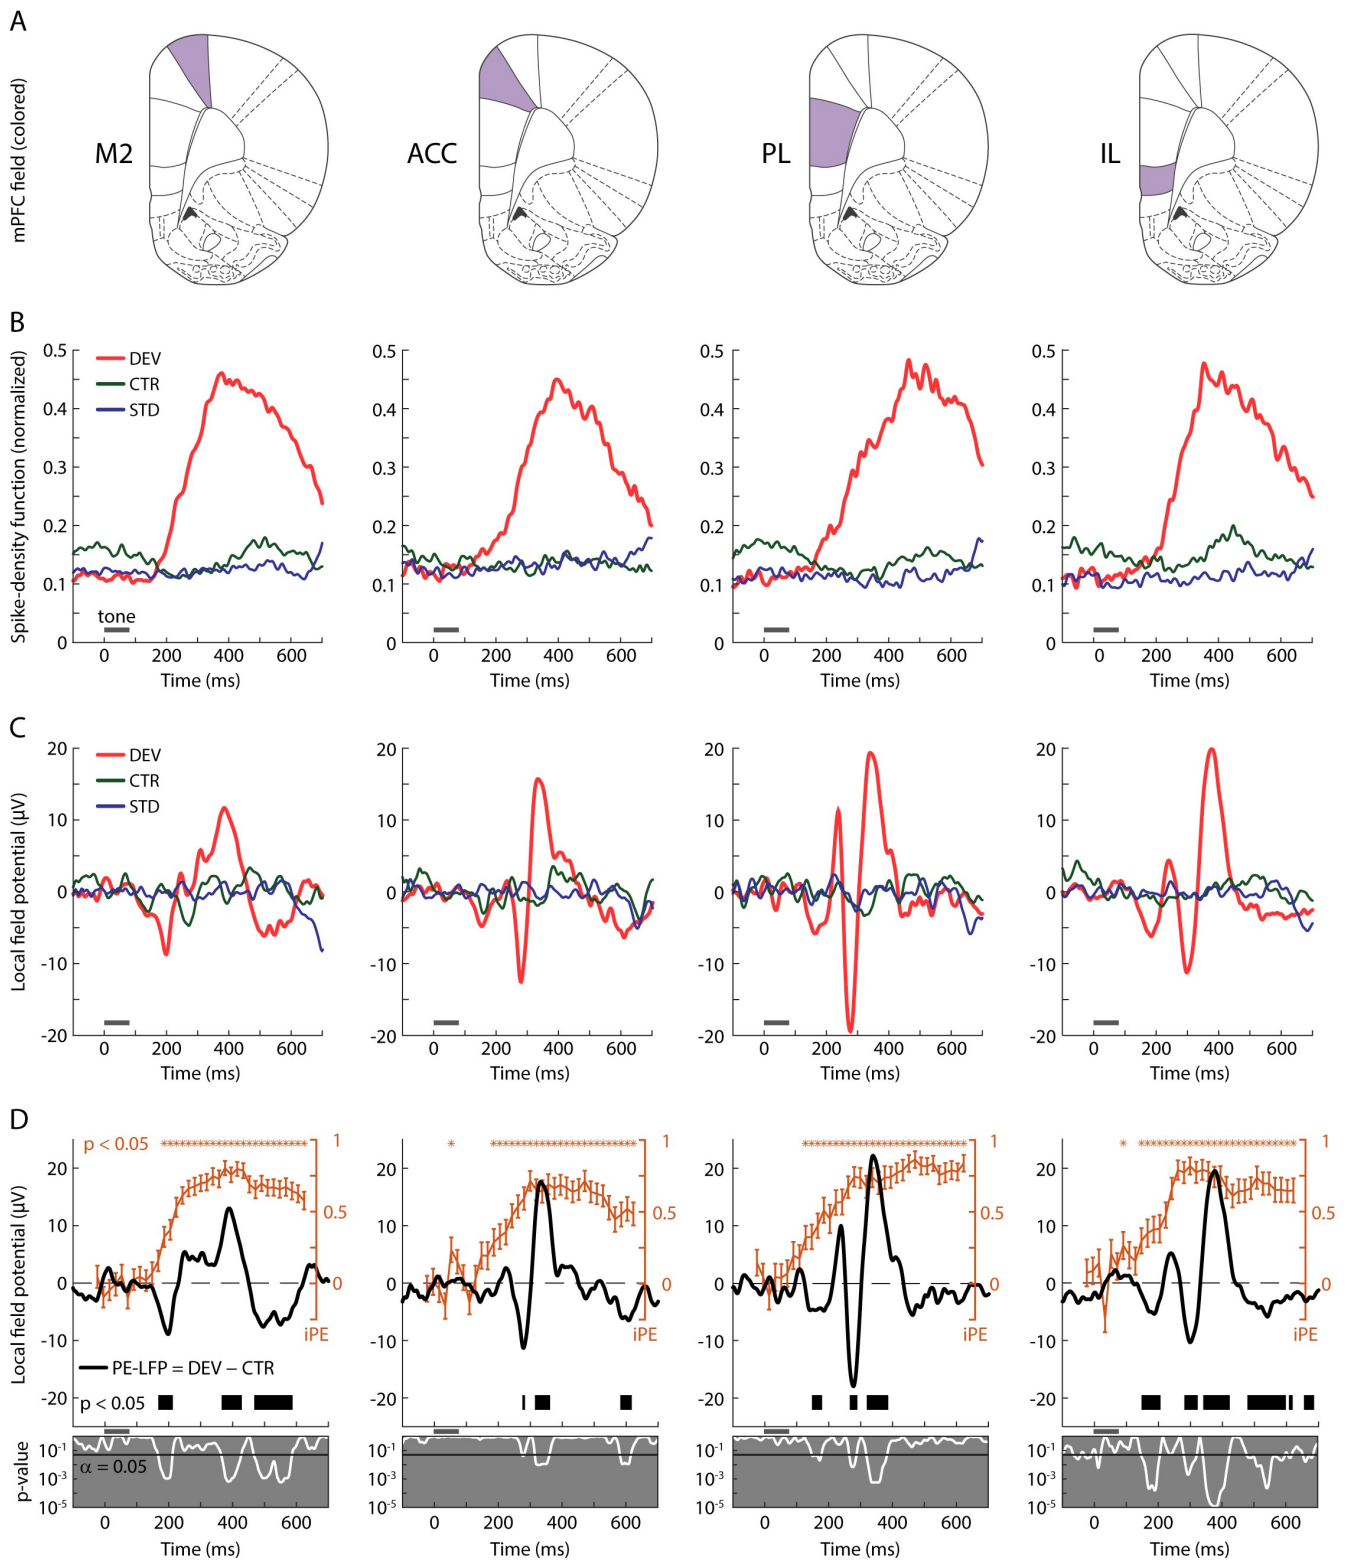

1107

1108 **Fig 4. LFP analysis. (A)** Schematic representation of coronal planes highlighting each mPFC field

1109 for column-wise reference. **(B)** Average firing rate profiles of each mPFC field as the normalized

1110 spike-density function for every condition. Grey horizontal lines illustrate tone presentation. **(C)**

1111 Average LFP across all tested tones and multiunit recordings from each mPFC field for every

1112 condition. **(D)** In orange, the time course of the average iPE of the spiking activity (mean  $\pm$  SEM)  
1113 where the asterisks above mark a significant iPE value ( $p < 0.05$ ) for the corresponding time  
1114 window. In black, PE-LFP is the difference wave between the LFPs of DEV and CTR. The thick  
1115 black horizontal bar below marks the time intervals were the PE-LFP turns significant ( $p < 0.05$ ).  
1116 The grey sublets below display with a white trace the instantaneous  $p$  values corresponding to the  
1117 PE-LFP of each mPFC field. The underlying data for this Figure can be found in S3 Data. Anterior  
1118 cingulate cortex (ACC), control condition (CTR), deviant condition (DEV), index of prediction error  
1119 (iPE), infralimbic cortex (IL), local field potentials (LFP), prediction error potential (PE-LFP),  
1120 prelimbic cortex (PL), secondary motor cortex (M2), standard condition (STD).

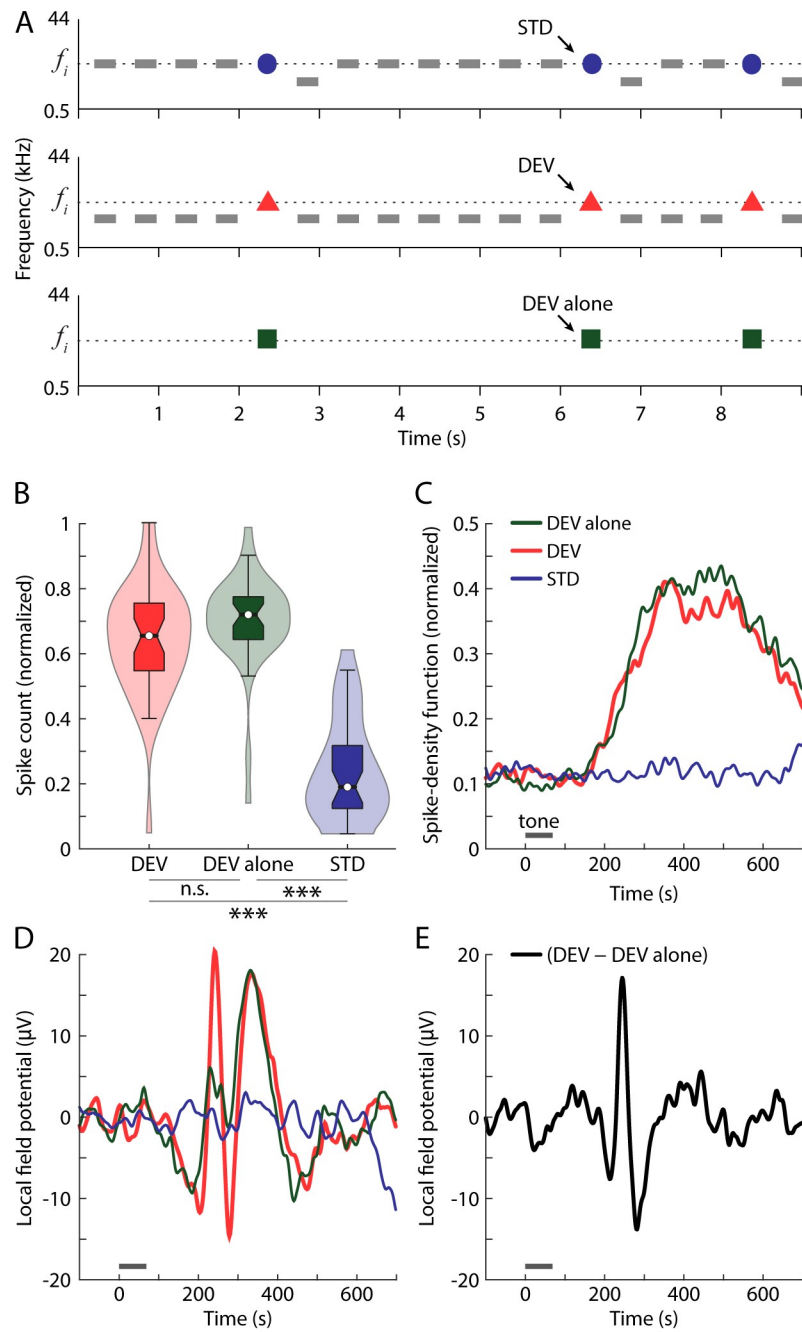

1121

1122 **Fig 5. DEV alone analysis.** (A) Illustration of the DEV alone condition as an oddball paradigm

1123 where the STD train is muted. (B) Violin plots representing the distribution of normalized spike

1124 counts for each experimental condition. The boxplots inside each distribution indicates the median as

1125 a white dot, the interquartile range as the box, and the confidence interval for the median as the

1126 notches. (C) Average firing rate profiles as the normalized spike-density function for every

1127 condition. Grey horizontal lines illustrate tone presentation. (D) Average LFP across all tested tones

1128 and multiunit recording for different conditions. (E) Difference wave between the LFP to the DEV

1129 and to the DEV alone. The underlying data for this Figure can be found in S4 Data. Deviant  
 1130 condition (DEV), local field potentials (LFP), standard condition (STD).

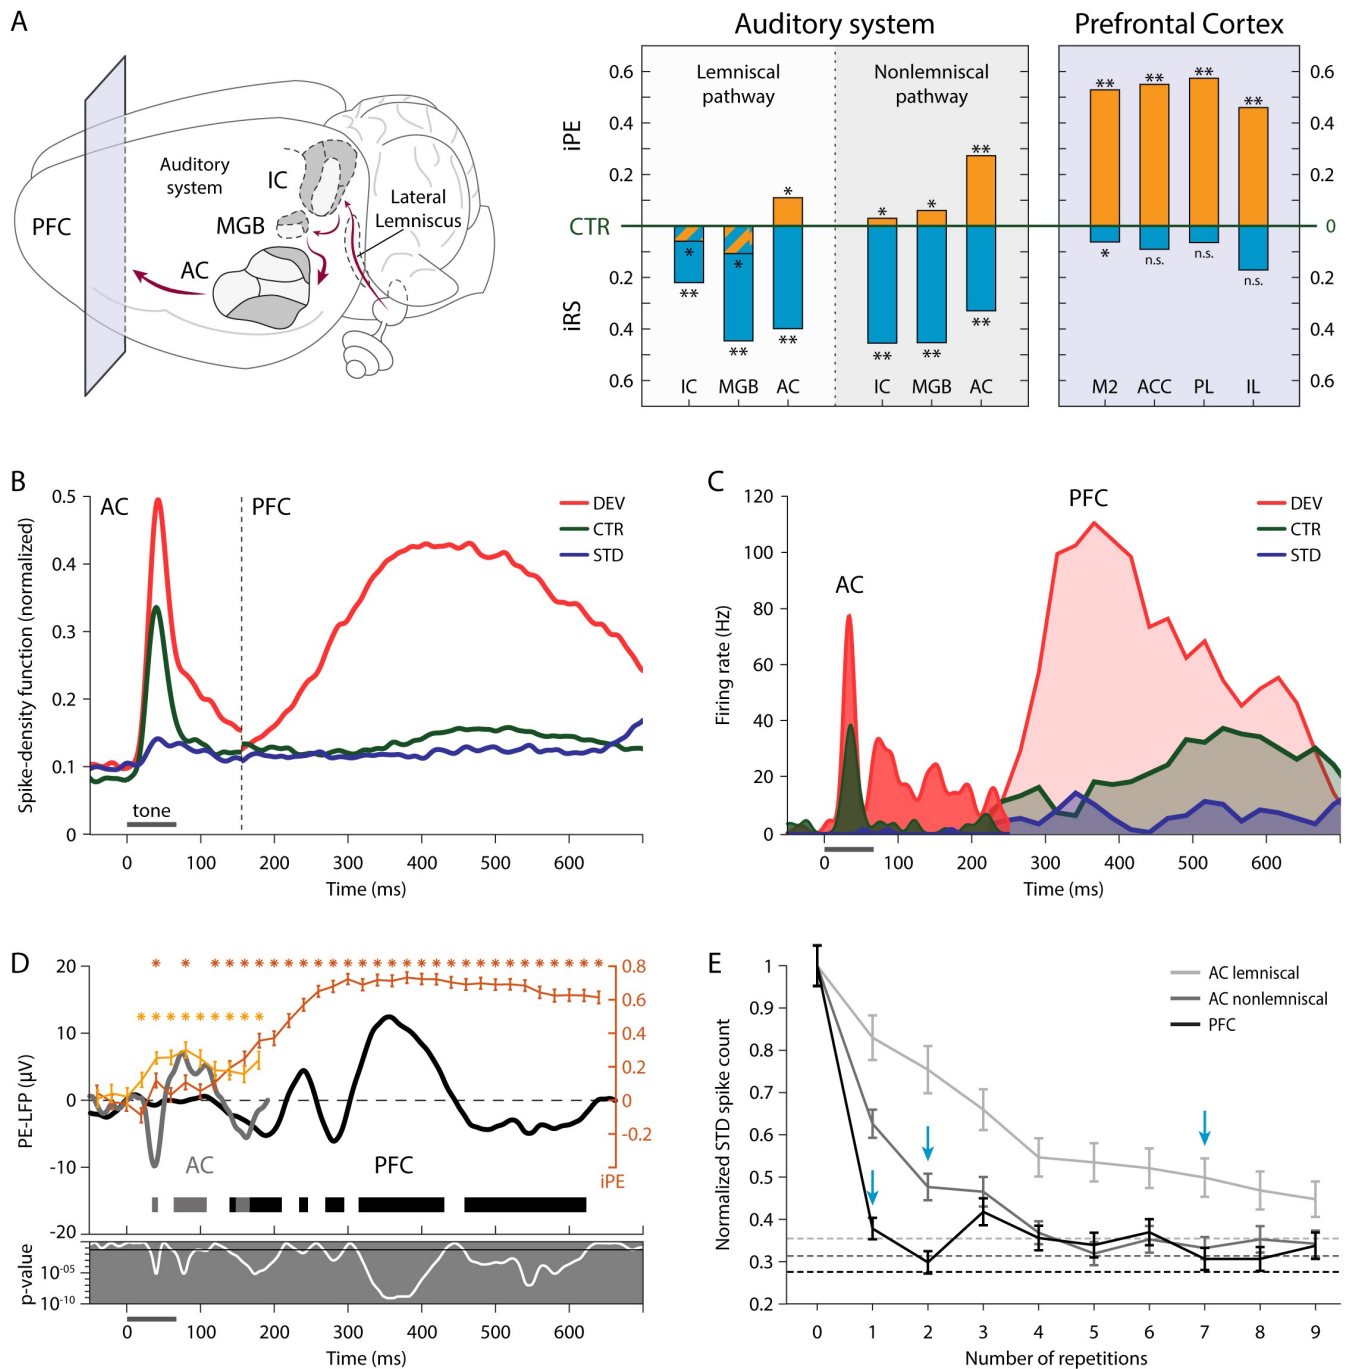

1131

1132 **Fig 6. Comparisons between AC and mPFC responses. (A)** Median iPE (orange) and iRS (cyan)

1133 of each auditory or prefrontal subdivision, represented with respect to the baseline set by the CTR.

1134 Thereby, iPE is upwards-positive while iRS is downwards-positive (see Fig 1B). Asterisks denote

1135 statistical significance of the indices against zero median (*n.s.* non-significant,  $*p < 0.05$ ,  $**p < 0.01$ ,

1136 \*\*\* $p < 0.001$ ). **(B)** Within the interval of 0-150 ms post-stimulus onset, average firing rate profile of  
1137 the nonlemniscal AC as the normalized spike-density function for every condition. Similarly, the  
1138 mPFC firing rate profile is displayed within the interval of 150-700 ms. Grey horizontal lines  
1139 illustrate tone presentation. **(C)** Peristimulus histogram examples of one nonlemniscal AC single unit  
1140 (in solid colors) and one mPFC multiunit (in transparent colors), plotted together. Spontaneous  
1141 activity in the mPFC before 200 ms post-stimulus onset has not been represented for clarity. **(D)** In  
1142 orange tones, time course of the average iPE of the spiking activity (mean  $\pm$  SEM) in the  
1143 nonlemniscal AC (in light orange) and in the mPFC (in dark orange), where the asterisks above mark  
1144 a significant iPE value ( $p < 0.05$ ) for the corresponding time window. In dark tones, the PE-LFP is  
1145 the difference wave between the LFP to the DEV and to the CTR recorded from the nonlemniscal  
1146 AC (in grey) and from the mPFC (in black). The thick horizontal bar below marks the time intervals  
1147 were the PE-LFP of the nonlemniscal AC (in grey) and the mPFC (in black) turns significant ( $p <$   
1148  $0.05$ ). The grey subplot below displays the instantaneous  $p$  values corresponding to the PE-LFP (in  
1149 white). **(E)** Average responses for the first 10 STD trials (mean  $\pm$  SEM) in the lemniscal AC (in light  
1150 grey), the nonlemniscal AC (in dark grey) and the mPFC (in black). Vertical cyan arrows mark the  
1151 trial where the initial STD response has undergone more than 50% of attenuation. Dashed lines mark  
1152 the maximum level of attenuation of the STD response during the sequence (the steady-state  
1153 parameter of a power-law fit of three parameters). The underlying data for this Figure can be found  
1154 in S5 Data. Anterior cingulate cortex (ACC), auditory cortex (AC), control condition (CTR), deviant  
1155 condition (DEV), index of prediction error (iPE), index of repetition suppression (iRS), inferior  
1156 colliculus (IC), infralimbic cortex (IL), local field potentials (LFP), medial geniculate body (MGB),  
1157 medial prefrontal cortex (mPFC), prediction error potential (PE-LFP), prefrontal cortex (PFC),  
1158 prelimbic cortex (PL), secondary motor cortex (M2), standard condition (STD), standard error of the  
1159 mean (SEM).
